# Supplementary material for: SynEM, automated synapse detection for connectomics
Source: eLife. 2017 Jul 14;6:e26414. doi: 10.7554/eLife.26414 (PMC5658066; doi:10.7554/eLife.26414)
Supplement: Figure 1—source data 1. — DOI: http://dx.doi.org/10.7554/eLife.26414.004 [file elife-26414-fig1-data1.xlsx]

## Sheet: Sheet1
Fig. 1b
	2503 μm3		1 mm3
	Exc.	Inh.	Exc.	Inh.
Syn (#)	14359375	1265625	919000000	81000000
Neurons (#)	2261.6	199.336	144742	12757.5
Axons (mm)	57437.5	5062.5	3676000	324000
Dendr. (mm)	6250		400000
Spines (mm)	12500		800000
Fig. 1c
	2503 μm3		1 mm3
	Exc.	Inh.	Exc.	Inh.
Contour (h)	24375000		1560000000
Contour range (h)	8125000
Skelet. (h)	442812		28340000
Skelet. range (h)	142188
Skelet. webKnossos	48750		3120000
Syn. vol. search (d) (h)	1.39805e+06	164453	89475000	10525000
Syn. vol. search (d) error (h)	37890.6	75781.2
Syn. axon based (e) (h)	167526	14765.6	1.07217e+07	945000
Syn. axon based (e) error (h)	71796.9	6328.12
