# Supplementary material for: SynEM, automated synapse detection for connectomics
Source: eLife. 2017 Jul 14;6:e26414. doi: 10.7554/eLife.26414 (PMC5658066; doi:10.7554/eLife.26414)
Supplement: Figure 2—source data 1. — DOI: http://dx.doi.org/10.7554/eLife.26414.006 [file elife-26414-fig2-data1.xlsx]

## Sheet: Sheet1
Fig. 2d
Syn.
Subvolume 1 (blue) bin edges	-5200	-5100	-5000	-4900	-4800	-4700	-4600	-4500	-4400	-4300	-4200	-4100	-4000	-3900	-3800	-3700	-3600	-3500	-3400	-3300	-3200	-3100	-3000	-2900	-2800	-2700	-2600	-2500	-2400
Subvolume 1 (blue) bincount	25	139	316	310	296	300	362	383	417	542	580	646	802	795	891	1017	1034	1123	1299	1474	1672	1937	1917	1703	1220	790	364	84
Subvolume 2 (green) bin edges	-5700	-5600	-5500	-5400	-5300	-5200	-5100	-5000	-4900	-4800	-4700	-4600	-4500	-4400	-4300	-4200	-4100	-4000	-3900	-3800	-3700	-3600	-3500	-3400	-3300	-3200	-3100	-3000	-2900	-2800	-2700	-2600	-2500	-2400
Subvolume 2 (green) bincount	5	57	277	717	958	1275	1433	1614	1332	1076	912	884	795	800	767	777	793	765	784	730	771	742	645	648	605	513	432	366	265	182	86	32	5
Interface border (red) bin edges	-3900	-3800	-3700	-3600	-3500	-3400	-3300	-3200	-3100	-3000	-2900	-2800	-2700	-2600	-2500	-2400
Interface border (red) bincount	1	17	20	32	49	68	113	166	164	214	291	263	321	174	47
Non-syn.
Subvolume 1 (blue) bin edges	-5300	-5250	-5200	-5150	-5100	-5050	-5000	-4950	-4900	-4850	-4800	-4750	-4700	-4650	-4600	-4550	-4500	-4450	-4400	-4350	-4300	-4250	-4200	-4150	-4100	-4050	-4000	-3950	-3900	-3850	-3800	-3750	-3700	-3650	-3600	-3550	-3500	-3450	-3400	-3350	-3300	-3250	-3200	-3150	-3100	-3050	-3000	-2950	-2900
Subvolume 1 (blue) bincount	1	16	40	87	165	219	246	281	255	278	366	362	451	475	512	546	492	573	593	656	744	786	775	839	905	948	950	1067	1038	1117	1134	1107	1141	1143	992	1082	1059	1019	979	959	910	869	824	740	722	644	559	406	309
Subvolume 2 (green) bin edges	-5600	-5500	-5400	-5300	-5200	-5100	-5000	-4900	-4800	-4700	-4600	-4500	-4400	-4300	-4200	-4100	-4000	-3900	-3800	-3700	-3600	-3500	-3400	-3300	-3200	-3100	-3000	-2900	-2800	-2700	-2600	-2500	-2400	-2300	-2200	-2100	-2000	-1900	-1800
Subvolume 2 (green) bincount	14	88	187	336	590	812	881	958	795	720	740	661	665	680	667	761	822	824	866	907	945	821	861	927	973	945	984	969	1061	1380	2009	2950	3546	3622	2625	1165	272	7
Interface border (red) bin edges	-4300	-4200	-4100	-4000	-3900	-3800	-3700	-3600	-3500	-3400	-3300	-3200	-3100	-3000	-2900	-2800	-2700	-2600	-2500	-2400	-2300	-2200	-2100	-2000
Interface border (red) bincount	14	18	19	42	84	174	203	251	289	317	368	373	317	301	294	241	210	172	111	60	12	3	1
[truncated: 11 more columns]
