# Supplementary material for: SynEM, automated synapse detection for connectomics
Source: eLife. 2017 Jul 14;6:e26414. doi: 10.7554/eLife.26414 (PMC5658066; doi:10.7554/eLife.26414)
Supplement: Figure 3—figure supplement 3—source data 1. — DOI: http://dx.doi.org/10.7554/eLife.26414.013 [file elife-26414-fig3-figsupp3-data1.xlsx]

## Sheet: Sheet1
Fig. 3 - figure supplement 3
Becker et al., 2012 recall (All syn.)	0.812766	0.808511	0.8	0.8	0.791489	0.787234	0.770213	0.765957	0.744681	0.73617	0.72766	0.714894	0.706383	0.697872	0.693617	0.685106	0.680851	0.67234	0.668085	0.646809	0.638298	0.629787	0.625532	0.608511	0.591489	0.582979	0.574468	0.531915	0.514894	0.489362	0.480851	0.446809	0.412766	0.378723	0.331915	0.276596	0.221277	0.148936	0.0808511	0.0212766
Becker et al., 2012 precision (All syn.)	0.349177	0.367505	0.37751	0.39413	0.400862	0.411111	0.423888	0.437956	0.444162	0.451697	0.460916	0.481375	0.495522	0.51735	0.530945	0.545763	0.57971	0.603053	0.620553	0.64135	0.669643	0.688372	0.717073	0.748691	0.747312	0.782857	0.808383	0.811688	0.840278	0.851852	0.875969	0.889831	0.906542	0.936842	0.95122	0.984848	1	1	1	1
Becker et al., 2012 recall (Exc. spine syn.)	0.862745	0.857843	0.857843	0.857843	0.848039	0.843137	0.823529	0.818627	0.794118	0.789216	0.784314	0.779412	0.769608	0.759804	0.754902	0.745098	0.740196	0.730392	0.72549	0.70098	0.696078	0.686275	0.681373	0.666667	0.651961	0.642157	0.632353	0.583333	0.573529	0.544118	0.534314	0.495098	0.455882	0.416667	0.372549	0.308824	0.25	0.166667	0.0931373	0.0245098
Becker et al., 2012 precision (Exc. spine syn.)	0.330827	0.348606	0.360825	0.377155	0.383592	0.393593	0.405797	0.419598	0.425197	0.433962	0.444444	0.467647	0.481595	0.503247	0.516779	0.531469	0.565543	0.588933	0.606557	0.627193	0.657407	0.676329	0.705584	0.73913	0.738889	0.775148	0.801242	0.804054	0.835714	0.847328	0.872	0.885965	0.902913	0.934066	0.95	0.984375	1	1	1	1
Dorkenwald et al., 2017 recall (All syn.)	0.995745	0.991489	0.991489	0.987234	0.987234	0.978723	0.970213	0.970213	0.970213	0.970213	0.961702	0.957447	0.953191	0.948936	0.944681	0.93617	0.93617	0.93617	0.93617	0.93617	0.93617	0.931915	0.931915	0.931915	0.931915	0.931915	0.92766	0.92766	0.92766	0.919149	0.914894	0.914894	0.914894	0.910638	0.910638	0.902128	0.902128	0.902128	0.897872	0.893617	0.885106	0.880851	0.880851	0.876596	0.876596	0.87234	0.86383	0.86383	0.859574
Dorkenwald et al., 2017 precision (All syn.)	0.639344	0.598972	0.628032	0.63388	0.63388	0.644258	0.655172	0.666667	0.662791	0.666667	0.678679	0.688073	0.682927	0.692547	0.69375	0.705128	0.707395	0.711974	0.726073	0.733333	0.738255	0.734899	0.74744	0.744898	0.744898	0.739865	0.746575	0.762238	0.767606	0.765957	0.767857	0.767857	0.767857	0.772563	0.772563	0.776557	0.779412	0.779412	0.775735	0.777778	0.776119	0.778195	0.787072	0.795367	0.795367	0.794574	0.808765	0.808765	0.821138
Dorkenwald et al., 2017 recall (Exc. spine syn.)	1	0.995098	0.995098	0.995098	0.995098	0.995098	0.990196	0.990196	0.990196	0.990196	0.985294	0.980392	0.97549	0.970588	0.970588	0.965686	0.965686	0.965686	0.965686	0.965686	0.965686	0.960784	0.960784	0.960784	0.960784	0.960784	0.955882	0.955882	0.955882	0.946078	0.941176	0.941176	0.941176	0.936275	0.936275	0.931373	0.931373	0.931373	0.926471	0.921569	0.916667	0.911765	0.911765	0.906863	0.906863	0.901961	0.892157	0.892157	0.887255
Dorkenwald et al., 2017 precision (Exc. spine syn.)	0.607143	0.56546	0.595308	0.602374	0.602374	0.615152	0.627329	0.639241	0.63522	0.639241	0.652597	0.662252	0.656766	0.666667	0.668919	0.681661	0.684028	0.688811	0.703571	0.711191	0.716364	0.712727	0.725926	0.723247	0.723247	0.717949	0.724907	0.741445	0.747126	0.745174	0.747082	0.747082	0.747082	0.751969	0.751969	0.756972	0.76	0.76	0.756	0.758065	0.757085	0.759184	0.768595	0.777311	0.777311	0.776371	0.791304	0.791304	0.804444
SynEM recall (All syn.)	1	1	1	1	1	1	1	1	1	1	1	1	1	1	1	1	1	1	1	1	1	1	1	1	1	1	1	1	1	1	1	1	1	1	1	1	1	1	1	1	1	1	1	1	1	1	1	1	1
SynEM precision (All syn.)	0.0114333	0.0114339	0.0114344	0.011435	0.0114355	0.0114361	0.0114366	0.0114372	0.0114377	0.0114383	0.0114389	0.0114394	0.01144	0.0114405	0.0114411	0.0114416	0.0114422	0.0114428	0.0114439	0.011445	0.0114455	0.0114461	0.0114467	0.0114472	0.0114478	0.0114483	0.0114489	0.0114495	0.01145	0.0114517	0.0114522	0.0114534	0.0114539	0.0114545	0.011455	0.0114556	0.0114561	0.0114567	0.0114584	0.0114589	0.0114595	0.0114606	0.0114623	0.0114634	0.0114645	0.0114651	0.0114673	0.0114679	0.0114684
SynEM recall (Exc. spine syn.)	1	1	1	1	1	1	1	1	1	1	1	1	1	1	1	1	1	1	1	1	1	1	1	1	1	1	1	1	1	1	1	1	1	1	1	1	1	1	1	1	1	1	1	1	1	1	1	1	1
SynEM precision (Exc. spine syn.)	0.00994007	0.00994055	0.00994104	0.00994152	0.009942	0.00994249	0.00994297	0.00994346	0.00994394	0.00994443	0.00994491	0.0099454	0.00994588	0.00994637	0.00994685	0.00994734	0.00994782	0.00994831	0.00994928	0.00995025	0.00995073	0.00995122	0.0099517	0.00995219	0.00995268	0.00995316	0.00995365	0.00995413	0.00995462	0.00995608	0.00995656	0.00995753	0.00995802	0.00995851	0.00995899	0.00995948	0.00995996	0.00996045	0.00996191	0.0099624	0.00996288	0.00996386	0.00996532	0.00996629	0.00996726	0.00996775	0.0099697	0.00997019	0.00997067
[truncated: 1,447 more columns]
