# Supplementary material for: SynEM, automated synapse detection for connectomics
Source: eLife. 2017 Jul 14;6:e26414. doi: 10.7554/eLife.26414 (PMC5658066; doi:10.7554/eLife.26414)
Supplement: Figure 3—figure supplement 4—source data 2. — DOI: http://dx.doi.org/10.7554/eLife.26414.015 [file elife-26414-fig3-figsupp4-data2.xlsx]

## Sheet: Sheet1
Fig. 3 - figure supplement 4
SynEM recall	1	1	1	1	1	1	1	1	1	1	1	1	1	1	1	1	1	1	1	1	1	1	1	1	1	1	1	1	1	1	1	1	1	1	1	1	1	1	1	1	1	1	1	1	1	1	1	1	1
SynEM precision	0.0199005	0.019902	0.0199036	0.0199051	0.0199067	0.0199082	0.0199098	0.0199113	0.0199129	0.0199144	0.019916	0.0199175	0.0199191	0.0199206	0.0199222	0.0199237	0.0199268	0.0199284	0.0199299	0.0199315	0.0199361	0.0199377	0.0199408	0.0199424	0.0199439	0.0199455	0.019947	0.0199486	0.0199517	0.0199548	0.0199579	0.0199595	0.019961	0.0199626	0.0199657	0.0199672	0.0199704	0.0199735	0.0199766	0.0199781	0.0199813	0.0199844	0.0199875	0.0199906	0.0199953	0.0199969	0.02	0.0200047	0.0200063
VesicleCNN recall	0.580388	0.713752	0.731208	0.740243	0.748081	0.756434	0.772969	0.789949	0.806844	0.831539	0.839684	0.856735	0.866252	0.890786	0.899013	0.916022	0.923855	0.932936	0.940837	0.949807	0.957574
VesicleCNN precision	0.957676	0.934186	0.925601	0.916044	0.873893	0.848919	0.836256	0.831832	0.81425	0.799757	0.782008	0.733985	0.730217	0.720708	0.652485	0.605028	0.516255	0.472918	0.446107	0.272979	0.115971
[truncated: 1,384 more columns]
