# Supplementary material for: SynEM, automated synapse detection for connectomics
Source: eLife. 2017 Jul 14;6:e26414. doi: 10.7554/eLife.26414 (PMC5658066; doi:10.7554/eLife.26414)
Supplement: Figure 3—source data 1. — DOI: http://dx.doi.org/10.7554/eLife.26414.009 [file elife-26414-fig3-data1.xlsx]

## Sheet: Sheet1
Fig. 3a
Syn. bin centers	-7.64916	-7.39378	-7.13839	-6.88301	-6.62762	-6.37224	-6.11686	-5.86147	-5.60609	-5.35071	-5.09532	-4.83994	-4.58456	-4.32917	-4.07379	-3.81841	-3.56302	-3.30764	-3.05225	-2.79687	-2.54149	-2.2861	-2.03072	-1.77534	-1.51995	-1.26457	-1.00919	-0.753803	-0.498419	-0.243036	0.0123479	0.267732	0.523115	0.778499	1.03388	1.28927	1.54465	1.80003	2.05542	2.3108	2.56618	2.82157	3.07695	3.33233	3.58772	3.8431	4.09848	4.35387	4.60925
Syn. bin counts	1	0	0	0	0	0	1	1	0	0	2	0	3	1	3	1	2	4	3	4	4	7	2	5	11	16	11	10	15	18	12	16	18	24	24	15	16	17	11	25	9	16	8	15	17	3	7	9	3
No syn. bin centers	-18.5587	-18.3604	-18.1621	-17.9639	-17.7656	-17.5674	-17.3691	-17.1708	-16.9726	-16.7743	-16.576	-16.3778	-16.1795	-15.9813	-15.783	-15.5847	-15.3865	-15.1882	-14.9899	-14.7917	-14.5934	-14.3952	-14.1969	-13.9986	-13.8004	-13.6021	-13.4038	-13.2056	-13.0073	-12.8091	-12.6108	-12.4125	-12.2143	-12.016	-11.8178	-11.6195	-11.4212	-11.223	-11.0247	-10.8264	-10.6282	-10.4299	-10.2317	-10.0334	-9.83513	-9.63687	-9.43861	-9.24034	-9.04208
No syn. bin counts	2	1	1	3	5	7	15	11	21	31	38	41	61	53	78	89	104	144	165	187	234	252	327	301	360	413	425	484	502	505	581	590	576	634	616	624	673	640	639	692	638	657	602	675	641	627	623	581	570
Fig. 3b
SynEM score direction 1	-2.80528	-4.93315	-9.27803	-5.10262	-6.7278	-5.80709	-12.7611	-8.5733	-8.64365	-6.61412	-6.01554	-9.21632	-3.8521	-2.40965	-2.64656	-8.7921	1.89408	-9.87965	-6.18584	-6.43715	-7.78617	-8.51002	-7.29282	-6.75301	0.471501	-8.60108	-1.62484	-11.9076	-6.9736	-4.77526	-8.49829	-0.782811	-8.01951	-9.3179	-11.5498	-7.35018	-4.09713	-1.11876	-4.70603	-5.73823	-12.2357	-5.50305	-10.099	-8.5513	-9.13374	2.44119	-10.6242	-5.01793	-6.72492
SynEM score direction 2	-7.38192	-8.43858	-9.62264	-8.00732	-2.06163	-1.34189	-7.86566	0.754003	1.40736	-4.90268	-4.72446	-3.04006	-6.17631	-3.68607	-4.40159	-8.49963	-7.5919	-7.70156	-10.1056	-7.56597	3.67745	-3.95156	4.47332	-0.783415	-9.54005	-7.74778	-5.6132	-2.6249	-12.1962	-8.96456	-14.1236	-10.124	-3.15553	-8.63704	-5.93947	-9.19602	-10.6029	-10.4012	-11.5043	-5.66806	-15.0642	-5.80189	-6.24645	-8.83115	-2.69917	-7.26952	-8.23442	-9.44301	-10.4405
Fig. 3d
Init (recall)	1	1	1	1	1	1	1	1	1	1	1	1	1	1	1	1	1	1	1	1	1	1	1	1	1	1	1	1	1	1	1	1	1	1	1	1	1	1	1	1	1	1	1	1	1	1	1	1	1
Init (precision)	0.0317964	0.031799	0.031799	0.031799	0.031799	0.031799	0.031799	0.031799	0.031799	0.031799	0.031799	0.031799	0.031799	0.031799	0.031799	0.031799	0.031799	0.031799	0.031799	0.031799	0.031799	0.031799	0.031799	0.031799	0.031799	0.031799	0.031799	0.031799	0.031799	0.031799	0.031799	0.031799	0.031799	0.031799	0.031799	0.031799	0.031799	0.031799	0.031799	0.031799	0.031799	0.031799	0.031799	0.031799	0.031799	0.031799	0.031799	0.031799	0.031799
Add feat (recall)	1	1	1	1	1	1	1	1	1	1	1	1	1	1	1	1	1	1	1	1	1	1	1	1	1	1	1	1	1	1	1	1	1	1	1	1	1	1	1	1	1	1	1	1	1	1	1	1	1
Add feat (precision)	0.0317964	0.031799	0.031799	0.031799	0.0318015	0.0318015	0.0318015	0.0318015	0.0318015	0.0318015	0.0318015	0.0318015	0.0318015	0.0318015	0.0318015	0.0318041	0.0318041	0.0318041	0.0318041	0.0318041	0.0318041	0.0318067	0.0318067	0.0318067	0.0318067	0.0318067	0.0318067	0.0318093	0.0318119	0.0318119	0.0318119	0.0318171	0.0318171	0.0318197	0.0318223	0.0318223	0.0318223	0.0318248	0.0318248	0.03183	0.03183	0.03183	0.0318352	0.0318378	0.0318404	0.031843	0.031843	0.0318456	0.0318456
Add subvol (recall)	1	1	1	1	1	1	1	1	1	1	1	1	1	1	1	1	1	1	1	1	1	1	1	1	1	1	1	1	1	1	1	1	1	1	1	1	1	1	1	1	1	1	1	1	1	1	1	1	1
Add subvol (precision)	0.0317964	0.031799	0.031799	0.031799	0.031799	0.031799	0.0318015	0.0318041	0.0318067	0.0318067	0.0318067	0.0318067	0.0318067	0.0318067	0.0318067	0.0318067	0.0318067	0.0318067	0.0318067	0.0318093	0.0318093	0.0318093	0.0318119	0.0318119	0.0318119	0.0318145	0.0318145	0.0318171	0.0318171	0.0318171	0.0318171	0.0318171	0.0318197	0.0318197	0.0318197	0.0318197	0.0318223	0.0318223	0.0318223	0.0318223	0.0318223	0.03183	0.0318326	0.0318352	0.0318378	0.0318378	0.0318378	0.0318404	0.0318404
Add stats (recall)	1	1	1	1	1	1	1	1	1	1	1	1	1	1	1	1	1	1	1	1	1	1	1	1	1	1	1	1	1	1	1	1	1	1	1	1	1	1	1	1	1	1	1	1	1	1	1	1	1
Add stats (precision)	0.0317964	0.031799	0.031799	0.031799	0.031799	0.031799	0.031799	0.031799	0.031799	0.031799	0.031799	0.031799	0.031799	0.031799	0.031799	0.031799	0.031799	0.031799	0.031799	0.031799	0.031799	0.031799	0.0318015	0.0318015	0.0318015	0.0318015	0.0318015	0.0318015	0.0318015	0.0318015	0.0318015	0.0318015	0.0318015	0.0318015	0.0318015	0.0318015	0.0318015	0.0318015	0.0318015	0.0318015	0.0318015	0.0318015	0.0318015	0.0318015	0.0318015	0.0318015	0.0318015	0.0318015	0.0318015
Direct (recall)	1	1	1	1	1	1	1	1	1	1	1	1	1	1	1	1	1	1	1	1	1	1	1	1	1	1	1	1	1	1	1	1	1	1	1	1	1	1	1	1	1	1	1	1	1	1	1	1	1
Direct (precision)	0.0317964	0.0317964	0.0317964	0.0317964	0.0317964	0.0317964	0.0317964	0.0317964	0.0317964	0.0317964	0.0317964	0.0317964	0.0317964	0.0317964	0.0317964	0.0317964	0.0317964	0.0317964	0.0317964	0.0317964	0.0317964	0.0317964	0.0317964	0.0317964	0.0317964	0.0317964	0.0317964	0.0317964	0.0317964	0.0317964	0.0317964	0.0317964	0.0317964	0.0317964	0.0317964	0.0317964	0.0317964	0.0317964	0.0317964	0.0317964	0.0317964	0.0317964	0.0317964	0.0317964	0.0317964	0.0317964	0.0317964	0.0317964	0.0317964
Logit (recall)	1	1	1	1	1	1	1	1	1	1	1	1	1	1	1	1	1	1	1	1	1	1	1	1	1	1	1	1	1	1	1	1	1	1	1	1	1	1	1	1	1	1	1	1	1	1	1	1	1
Logit (precision)	0.0317964	0.031799	0.031799	0.031799	0.031799	0.031799	0.0318015	0.0318015	0.0318015	0.0318015	0.0318015	0.0318015	0.0318015	0.0318015	0.0318015	0.0318015	0.0318015	0.0318015	0.0318015	0.0318015	0.0318015	0.0318015	0.0318015	0.0318015	0.0318015	0.0318015	0.0318015	0.0318015	0.0318015	0.0318015	0.0318015	0.0318015	0.0318015	0.0318015	0.0318015	0.0318015	0.0318015	0.0318015	0.0318015	0.0318015	0.0318015	0.0318015	0.0318015	0.0318015	0.0318015	0.0318015	0.0318015	0.0318041	0.0318041
Augment & Logit (recall)	1	1	1	1	1	1	1	1	1	1	1	1	1	1	1	1	1	1	1	1	1	1	1	1	1	1	1	1	1	1	1	1	1	1	1	1	1	1	1	1	1	1	1	1	1	1	1	1	1
Augment & Logit (precision)	0.0317964	0.031799	0.031799	0.031799	0.031799	0.031799	0.031799	0.031799	0.031799	0.031799	0.031799	0.031799	0.031799	0.031799	0.031799	0.031799	0.031799	0.031799	0.031799	0.031799	0.031799	0.031799	0.031799	0.0318015	0.0318015	0.0318015	0.0318015	0.0318015	0.0318015	0.0318015	0.0318015	0.0318015	0.0318015	0.0318015	0.0318015	0.0318015	0.0318015	0.0318015	0.0318015	0.0318015	0.0318015	0.0318015	0.0318015	0.0318015	0.0318015	0.0318015	0.0318015	0.0318015	0.0318015
Direct & Logic (recall)	1	1	1	1	1	1	1	1	1	1	1	1	1	1	1	1	1	1	1	1	1	1	1	1	1	1	1	1	1	1	1	1	1	1	1	1	1	1	1	1	1	1	1	1	1	1	1	1	1
Direct & Logic (precision)	0.0317964	0.0317964	0.0317964	0.0317964	0.0317964	0.0317964	0.0317964	0.0317964	0.0317964	0.0317964	0.0317964	0.0317964	0.0317964	0.0317964	0.0317964	0.0317964	0.0317964	0.0317964	0.0317964	0.0317964	0.0317964	0.0317964	0.0317964	0.0317964	0.0317964	0.0317964	0.0317964	0.0317964	0.0317964	0.0317964	0.0317964	0.0317964	0.0317964	0.0317964	0.0317964	0.0317964	0.0317964	0.0317964	0.0317964	0.0317964	0.0317964	0.0317964	0.0317964	0.0317964	0.0317964	0.0317964	0.0317964	0.0317964	0.0317964
Fig. 3e
All syn. (recall)	1	1	1	1	1	1	1	1	1	1	1	1	1	1	1	1	1	1	1	1	1	1	1	1	1	1	1	1	1	1	1	1	1	1	1	1	1	1	1	1	1	1	1	1	1	1	1	1	1
All syn. (precision)	0.0114333	0.0114339	0.0114344	0.011435	0.0114355	0.0114361	0.0114366	0.0114372	0.0114377	0.0114383	0.0114389	0.0114394	0.01144	0.0114405	0.0114411	0.0114416	0.0114422	0.0114428	0.0114439	0.011445	0.0114455	0.0114461	0.0114467	0.0114472	0.0114478	0.0114483	0.0114489	0.0114495	0.01145	0.0114517	0.0114522	0.0114534	0.0114539	0.0114545	0.011455	0.0114556	0.0114561	0.0114567	0.0114584	0.0114589	0.0114595	0.0114606	0.0114623	0.0114634	0.0114645	0.0114651	0.0114673	0.0114679	0.0114684
Exc. spine syn. (recall)	1	1	1	1	1	1	1	1	1	1	1	1	1	1	1	1	1	1	1	1	1	1	1	1	1	1	1	1	1	1	1	1	1	1	1	1	1	1	1	1	1	1	1	1	1	1	1	1	1
Exc. spine syn. (precision)	0.00994007	0.00994055	0.00994104	0.00994152	0.009942	0.00994249	0.00994297	0.00994346	0.00994394	0.00994443	0.00994491	0.0099454	0.00994588	0.00994637	0.00994685	0.00994734	0.00994782	0.00994831	0.00994928	0.00995025	0.00995073	0.00995122	0.0099517	0.00995219	0.00995268	0.00995316	0.00995365	0.00995413	0.00995462	0.00995608	0.00995656	0.00995753	0.00995802	0.00995851	0.00995899	0.00995948	0.00995996	0.00996045	0.00996191	0.0099624	0.00996288	0.00996386	0.00996532	0.00996629	0.00996726	0.00996775	0.0099697	0.00997019	0.00997067
Fig. 3f (top)
Voxel size (nm3)	100	200	300	400	500	600	700	800	900	1000	1100	1200	1300	1400	1500	1600	1700	1800	1900	2000	2100	2200	2300	2400	2500	2600	2700	2800	2900	3000	3100	3200	3300	3400	3500	3600	3700	3800	3900	4000
experiment duration (d/mm3 at 3 Mhz)	38580.2	19290.1	12860.1	9645.06	7716.05	6430.04	5511.46	4822.53	4286.69	3858.02	3507.3	3215.02	2967.71	2755.73	2572.02	2411.27	2269.43	2143.35	2030.54	1929.01	1837.15	1753.65	1677.4	1607.51	1543.21	1483.86	1428.9	1377.87	1330.35	1286.01	1244.52	1205.63	1169.1	1134.71	1102.29	1071.67	1042.71	1015.27	989.237	964.506
experiment duration (d/mm3 at 6 Mhz)	19290.1	9645.06	6430.04	4822.53	3858.02	3215.02	2755.73	2411.27	2143.35	1929.01	1753.65	1607.51	1483.86	1377.87	1286.01	1205.63	1134.71	1071.67	1015.27	964.506	918.577	876.824	838.701	803.755	771.605	741.928	714.449	688.933	665.177	643.004	622.262	602.816	584.549	567.357	551.146	535.837	521.355	507.635	494.619	482.253
experiment duration (d/mm3 at 10 Mhz)	11574.1	5787.04	3858.02	2893.52	2314.81	1929.01	1653.44	1446.76	1286.01	1157.41	1052.19	964.506	890.313	826.72	771.605	723.38	680.828	643.004	609.162	578.704	551.146	526.094	503.221	482.253	462.963	445.157	428.669	413.36	399.106	385.802	373.357	361.69	350.73	340.414	330.688	321.502	312.813	304.581	296.771	289.352
experiment duration (d/mm3 at 200 Mhz)	578.704	289.352	192.901	144.676	115.741	96.4506	82.672	72.338	64.3004	57.8704	52.6094	48.2253	44.5157	41.336	38.5802	36.169	34.0414	32.1502	30.4581	28.9352	27.5573	26.3047	25.161	24.1127	23.1481	22.2578	21.4335	20.668	19.9553	19.2901	18.6679	18.0845	17.5365	17.0207	16.5344	16.0751	15.6406	15.229	14.8386	14.4676
Fig. 3f (bottom)
	Voxel size (nm3)	F1 score
Mishchenko et al., 2010	180	0.824242
Kreshuk et al., 2011	144	0.904751
Kreshuk et al., 2014	911.25	0.90489
Becker et al., 2012	314.432	1
Becker et al., 2012 (SynEM test set)	3537.45	0.671642
Roncal et al., 2015	270	0.818814
Dorkenwald et al., 2017 (zebra finch)	1620	0.906
Dorkenwald et al., 2017 (zebra finch contact site classification)	1620	0.848941
Dorkenwald et al., 2017 (zebrafish)	1701	0.859
Dorkenwald et al., 2017 (mouse)	3000	0.854
Dorkenwald et al., 2017 (SynEM test set)	3537.45	0.852679
SynEM (ATUM)	270	0.94
SynEM (SynEM test set)	3537.45	0.883929
[truncated: 5,000 more columns]
