# Supplementary material for: SynEM, automated synapse detection for connectomics
Source: eLife. 2017 Jul 14;6:e26414. doi: 10.7554/eLife.26414 (PMC5658066; doi:10.7554/eLife.26414)
Supplement: Figure 4—source data 1. — DOI: http://dx.doi.org/10.7554/eLife.26414.017 [file elife-26414-fig4-data1.xlsx]

## Sheet: Sheet1
Fig. 4b
Feature importance (single features sorted)	0.00460815	0.00394786	0.0033863	0.00285228	0.00204546	0.00202801	0.00198274	0.00166049	0.00150321	0.00134122	0.00107687	0.00101606	0.000982454	0.000943431	0.000930725	0.000887897	0.000830173	0.000809669	0.000773178	0.000731884	0.00072358	0.000722681	0.000677527	0.000665638	0.000644964	0.000532146	0.000531192	0.000526574	0.000475385	0.000425334	0.000423393	0.000423244	0.00042291	0.000412583	0.000403879	0.000386053	0.000357947	0.000325985	0.000308992	0.000283453	0.000277156	0.000275319	0.000269993	0.000268141	0.000261112	0.00024393	0.000243693	0.000231819	0.000231689
	Feature importance
Subvolume 1 (largest)	0.0161921
Border	0.014671
Subvolume 2 (smallest)	0.00983553
Subvolume 2 (largest)	0.00762565
Subvolume 2 (intermediate)	0.00677223
Subvolume 1 (intermediate)	0.00391305
Subvolume 1 (smallest)	0.00281961
median	0.0138088
25 p	0.0106281
var	0.00855302
skew	0.00757014
min	0.00677532
75 p	0.00537037
kurt	0.00459235
max	0.00334664
mean	0.00118436
ST	0.0255543
Hess	0.0129551
DoG	0.00811149
Ggrad	0.00448498
Int./Var.	0.00388071
LEntrop.	0.00373451
PC1	0.00145964
Norm	0.00132566
Id	0.000688848
LoG	0.000611588
Avg	0.000397425
Volume	0.000160548
LStd.	8.45285e-05
Convhull	0
[truncated: 3,175 more columns]
