# Supplementary material for: SynEM, automated synapse detection for connectomics
Source: eLife. 2017 Jul 14;6:e26414. doi: 10.7554/eLife.26414 (PMC5658066; doi:10.7554/eLife.26414)
Supplement: Figure 5—figure supplement 1—source data 1. — DOI: http://dx.doi.org/10.7554/eLife.26414.022 [file elife-26414-fig5-figsupp1-data1.xlsx]

## Sheet: Sheet1
Fig. 5 - figure supplement 1
Synapse recall	1	1	1	1	1	1	1	1	1	1	1	1	1	1	1	1	1	1	1	1	1	1	1	1	1	1	1	1	1	1	1	1	1	1	1	1	1	1	1	1	1	1	1	1	1	1	1	1	1
Synapse precision	0.0204766	0.020479	0.0204815	0.0204839	0.0204864	0.0204889	0.0204913	0.0204938	0.0204962	0.0204987	0.0205011	0.0205036	0.0205061	0.0205085	0.020511	0.0205134	0.0205159	0.0205184	0.0205208	0.0205233	0.0205257	0.0205282	0.0205307	0.0205331	0.0205381	0.0205405	0.020543	0.0205455	0.0205504	0.0205529	0.0205554	0.0205603	0.0205628	0.0205652	0.0205677	0.0205702	0.0205727	0.0205776	0.0205801	0.0205826	0.02059	0.020595	0.0205999	0.0206024	0.0206049	0.0206099	0.0206148	0.0206173	0.0206223
Neuron-to-neuron recall	1	1	1	1	1	1	1	1	1	1	1	1	1	1	1	1	1	1	1	1	1	1	1	1	1	1	1	1	1	1	1	1	1	1	1	1	1	1	1	1	1	1	1	1	1	1	1	1	1
Neuron-to-neuron precision	0.6	0.6	0.6	0.6	0.6	0.6	0.6	0.6	0.6	0.6	0.6	0.6	0.6	0.6	0.6	0.6	0.6	0.6	0.6	0.6	0.6	0.6	0.6	0.6	0.6	0.6	0.6	0.6	0.6	0.6	0.6	0.6	0.6	0.6	0.6	0.6	0.6	0.6	0.6	0.6	0.6	0.6	0.6	0.6	0.6	0.6	0.6	0.6	0.6
[truncated: 1,383 more columns]
