# Supplementary material for: SynEM, automated synapse detection for connectomics
Source: eLife. 2017 Jul 14;6:e26414. doi: 10.7554/eLife.26414 (PMC5658066; doi:10.7554/eLife.26414)
Supplement: Figure 5—source data 1. — DOI: http://dx.doi.org/10.7554/eLife.26414.020 [file elife-26414-fig5-data1.xlsx]

## Sheet: Sheet1
Fig. 5b
nsyn per exc. connection	1	2	3	4	5	6	7	8
Frequency (average)	0.0175439	0.0701754	0.22807	0.192982	0.333333	0.0877193	0.0526316	0.0175439
Frequency (L4->L4)	0	0.181818	0.454545	0.181818	0.181818	0	0	0
Frequency (L4->L2/3)	0	0	0	0.461538	0.538462	0	0	0
Frequency (L2/3->L2/3)	0	0.25	0.625	0.125	0	0	0	0
Frequency (L5A->L5A)	0.166667	0	0.5	0	0.166667	0.166667	0	0
Frequency (L5B->L5B)	0	0	0	0.105263	0.473684	0.210526	0.157895	0.0526316
Fig. 5c
Synapse recall	1	1	1	1	1	1	1	1	1	1	1	1	1	1	1	1	1	1	1	1	1	1	1	1	1	1	1	1	1	1	1	1	1	1	1	1	1	1	1	1	1	1	1	1	1	1	1	1	1
Neuron-to-neuron recall (L4->L4; γnn = 1)	1	1	1	1	1	1	1	1	1	1	1	1	1	1	1	1	1	1	1	1	1	1	1	1	1	1	1	1	1	1	1	1	1	1	1	1	1	1	1	1	1	1	1	1	1	1	1	1	1
Neuron-to-neuron recall (L4->L2/3; γnn = 1)	1	1	1	1	1	1	1	1	1	1	1	1	1	1	1	1	1	1	1	1	1	1	1	1	1	1	1	1	1	1	1	1	1	1	1	1	1	1	1	1	1	1	1	1	1	1	1	1	1
Neuron-to-neuron recall (L2/3->L2/3; γnn = 1)	1	1	1	1	1	1	1	1	1	1	1	1	1	1	1	1	1	1	1	1	1	1	1	1	1	1	1	1	1	1	1	1	1	1	1	1	1	1	1	1	1	1	1	1	1	1	1	1	1
Neuron-to-neuron recall (L5A->L5A; γnn = 1)	1	1	1	1	1	1	1	1	1	1	1	1	1	1	1	1	1	1	1	1	1	1	1	1	1	1	1	1	1	1	1	1	1	1	1	1	1	1	1	1	1	1	1	1	1	1	1	1	1
Neuron-to-neuron recall (L5A->L5A; γnn = 1)	1	1	1	1	1	1	1	1	1	1	1	1	1	1	1	1	1	1	1	1	1	1	1	1	1	1	1	1	1	1	1	1	1	1	1	1	1	1	1	1	1	1	1	1	1	1	1	1	1
Neuron-to-neuron recall (Average; γnn = 1)	1	1	1	1	1	1	1	1	1	1	1	1	1	1	1	1	1	1	1	1	1	1	1	1	1	1	1	1	1	1	1	1	1	1	1	1	1	1	1	1	1	1	1	1	1	1	1	1	1
Neuron-to-neuron recall (L4->L4; γnn = 2)	1	1	1	1	1	1	1	1	1	1	1	1	1	1	1	1	1	1	1	1	1	1	1	1	1	1	1	1	1	1	1	1	1	1	1	1	1	1	1	1	1	1	1	1	1	1	1	1	1
Neuron-to-neuron recall (L4->L2/3; γnn = 2)	1	1	1	1	1	1	1	1	1	1	1	1	1	1	1	1	1	1	1	1	1	1	1	1	1	1	1	1	1	1	1	1	1	1	1	1	1	1	1	1	1	1	1	1	1	1	1	1	1
Neuron-to-neuron recall (L2/3->L2/3; γnn = 2)	1	1	1	1	1	1	1	1	1	1	1	1	1	1	1	1	1	1	1	1	1	1	1	1	1	1	1	1	1	1	1	1	1	1	1	1	1	1	1	1	1	1	1	1	1	1	1	1	1
Neuron-to-neuron recall (L5A->L5A; γnn = 2)	0.833333	0.833333	0.833333	0.833333	0.833333	0.833333	0.833333	0.833333	0.833333	0.833333	0.833333	0.833333	0.833333	0.833333	0.833333	0.833333	0.833333	0.833333	0.833333	0.833333	0.833333	0.833333	0.833333	0.833333	0.833333	0.833333	0.833333	0.833333	0.833333	0.833333	0.833333	0.833333	0.833333	0.833333	0.833333	0.833333	0.833333	0.833333	0.833333	0.833333	0.833333	0.833333	0.833333	0.833333	0.833333	0.833333	0.833333	0.833333	0.833333
Neuron-to-neuron recall (L5A->L5A; γnn = 2)	1	1	1	1	1	1	1	1	1	1	1	1	1	1	1	1	1	1	1	1	1	1	1	1	1	1	1	1	1	1	1	1	1	1	1	1	1	1	1	1	1	1	1	1	1	1	1	1	1
Neuron-to-neuron recall (Average; γnn = 2)	0.982456	0.982456	0.982456	0.982456	0.982456	0.982456	0.982456	0.982456	0.982456	0.982456	0.982456	0.982456	0.982456	0.982456	0.982456	0.982456	0.982456	0.982456	0.982456	0.982456	0.982456	0.982456	0.982456	0.982456	0.982456	0.982456	0.982456	0.982456	0.982456	0.982456	0.982456	0.982456	0.982456	0.982456	0.982456	0.982456	0.982456	0.982456	0.982456	0.982456	0.982456	0.982456	0.982456	0.982456	0.982456	0.982456	0.982456	0.982456	0.982456
Fig. 5d
Synapse precision	0.0114333	0.0114339	0.0114344	0.011435	0.0114355	0.0114361	0.0114366	0.0114372	0.0114377	0.0114383	0.0114389	0.0114394	0.01144	0.0114405	0.0114411	0.0114416	0.0114422	0.0114428	0.0114439	0.011445	0.0114455	0.0114461	0.0114467	0.0114472	0.0114478	0.0114483	0.0114489	0.0114495	0.01145	0.0114517	0.0114522	0.0114534	0.0114539	0.0114545	0.011455	0.0114556	0.0114561	0.0114567	0.0114584	0.0114589	0.0114595	0.0114606	0.0114623	0.0114634	0.0114645	0.0114651	0.0114673	0.0114679	0.0114684
Neuron-to-neuron precision (L4->L4; γnn = 1)	0.2	0.2	0.2	0.2	0.2	0.2	0.2	0.2	0.2	0.2	0.2	0.2	0.2	0.2	0.2	0.2	0.2	0.2	0.2	0.2	0.2	0.2	0.2	0.2	0.2	0.2	0.2	0.2	0.2	0.2	0.2	0.2	0.2	0.2	0.2	0.2	0.2	0.2	0.2	0.2	0.2	0.2	0.2	0.2	0.2	0.2	0.2	0.2	0.2
Neuron-to-neuron precision (L4->L2/3; γnn = 1)	0.2	0.2	0.2	0.2	0.2	0.2	0.2	0.2	0.2	0.2	0.2	0.2	0.2	0.2	0.2	0.2	0.2	0.2	0.2	0.2	0.2	0.2	0.2	0.2	0.2	0.2	0.2	0.2	0.2	0.2	0.2	0.2	0.2	0.2	0.2	0.2	0.2	0.2	0.2	0.2	0.2	0.2	0.2	0.2	0.2	0.2	0.2	0.2	0.2
Neuron-to-neuron precision (L2/3->L2/3; γnn = 1)	0.2	0.2	0.2	0.2	0.2	0.2	0.2	0.2	0.2	0.2	0.2	0.2	0.2	0.2	0.2	0.2	0.2	0.2	0.2	0.2	0.2	0.2	0.2	0.2	0.2	0.2	0.2	0.2	0.2	0.2	0.2	0.2	0.2	0.2	0.2	0.2	0.2	0.2	0.2	0.2	0.2	0.2	0.2	0.2	0.2	0.2	0.2	0.2	0.2
Neuron-to-neuron precision (L5A->L5A; γnn = 1)	0.2	0.2	0.2	0.2	0.2	0.2	0.2	0.2	0.2	0.2	0.2	0.2	0.2	0.2	0.2	0.2	0.2	0.2	0.2	0.2	0.2	0.2	0.2	0.2	0.2	0.2	0.2	0.2	0.2	0.2	0.2	0.2	0.2	0.2	0.2	0.2	0.2	0.2	0.2	0.2	0.2	0.2	0.2	0.2	0.2	0.2	0.2	0.2	0.2
Neuron-to-neuron precision (L5A->L5A; γnn = 1)	0.2	0.2	0.2	0.2	0.2	0.2	0.2	0.2	0.2	0.2	0.2	0.2	0.2	0.2	0.2	0.2	0.2	0.2	0.2	0.2	0.2	0.2	0.2	0.2	0.2	0.2	0.2	0.2	0.2	0.2	0.2	0.2	0.2	0.2	0.2	0.2	0.2	0.2	0.2	0.2	0.2	0.2	0.2	0.2	0.2	0.2	0.2	0.2	0.2
Neuron-to-neuron precision (Average; γnn = 1)	0.2	0.2	0.2	0.2	0.2	0.2	0.2	0.2	0.2	0.2	0.2	0.2	0.2	0.2	0.2	0.2	0.2	0.2	0.2	0.2	0.2	0.2	0.2	0.2	0.2	0.2	0.2	0.2	0.2	0.2	0.2	0.2	0.2	0.2	0.2	0.2	0.2	0.2	0.2	0.2	0.2	0.2	0.2	0.2	0.2	0.2	0.2	0.2	0.2
Neuron-to-neuron precision (L4->L4; γnn = 2)	0.2	0.2	0.2	0.2	0.2	0.2	0.2	0.2	0.2	0.2	0.2	0.2	0.2	0.2	0.2	0.2	0.2	0.2	0.2	0.2	0.2	0.2	0.2	0.2	0.2	0.2	0.2	0.2	0.2	0.2	0.2	0.2	0.2	0.2	0.2	0.2	0.2	0.2	0.2	0.2	0.2	0.2	0.2	0.2	0.2	0.2	0.2	0.2	0.2
Neuron-to-neuron precision (L4->L2/3; γnn = 2)	0.2	0.2	0.2	0.2	0.2	0.2	0.2	0.2	0.2	0.2	0.2	0.2	0.2	0.2	0.2	0.2	0.2	0.2	0.2	0.2	0.2	0.2	0.2	0.2	0.2	0.2	0.2	0.2	0.2	0.2	0.2	0.2	0.2	0.2	0.2	0.2	0.2	0.2	0.2	0.2	0.2	0.2	0.2	0.2	0.2	0.2	0.2	0.2	0.2
Neuron-to-neuron precision (L2/3->L2/3; γnn = 2)	0.2	0.2	0.2	0.2	0.2	0.2	0.2	0.2	0.2	0.2	0.2	0.2	0.2	0.2	0.2	0.2	0.2	0.2	0.2	0.2	0.2	0.2	0.2	0.2	0.2	0.2	0.2	0.2	0.2	0.2	0.2	0.2	0.2	0.2	0.2	0.2	0.2	0.2	0.2	0.2	0.2	0.2	0.2	0.2	0.2	0.2	0.2	0.2	0.2
Neuron-to-neuron precision (L5A->L5A; γnn = 2)	0.172414	0.172414	0.172414	0.172414	0.172414	0.172414	0.172414	0.172414	0.172414	0.172414	0.172414	0.172414	0.172414	0.172414	0.172414	0.172414	0.172414	0.172414	0.172414	0.172414	0.172414	0.172414	0.172414	0.172414	0.172414	0.172414	0.172414	0.172414	0.172414	0.172414	0.172414	0.172414	0.172414	0.172414	0.172414	0.172414	0.172414	0.172414	0.172414	0.172414	0.172414	0.172414	0.172414	0.172414	0.172414	0.172414	0.172414	0.172414	0.172414
Neuron-to-neuron precision (L5A->L5A; γnn = 2)	0.2	0.2	0.2	0.2	0.2	0.2	0.2	0.2	0.2	0.2	0.2	0.2	0.2	0.2	0.2	0.2	0.2	0.2	0.2	0.2	0.2	0.2	0.2	0.2	0.2	0.2	0.2	0.2	0.2	0.2	0.2	0.2	0.2	0.2	0.2	0.2	0.2	0.2	0.2	0.2	0.2	0.2	0.2	0.2	0.2	0.2	0.2	0.2	0.2
Neuron-to-neuron precision (Average; γnn = 2)	0.197183	0.197183	0.197183	0.197183	0.197183	0.197183	0.197183	0.197183	0.197183	0.197183	0.197183	0.197183	0.197183	0.197183	0.197183	0.197183	0.197183	0.197183	0.197183	0.197183	0.197183	0.197183	0.197183	0.197183	0.197183	0.197183	0.197183	0.197183	0.197183	0.197183	0.197183	0.197183	0.197183	0.197183	0.197183	0.197183	0.197183	0.197183	0.197183	0.197183	0.197183	0.197183	0.197183	0.197183	0.197183	0.197183	0.197183	0.197183	0.197183
Fig. 5e	1 - F1	Min. (1 - F1) for different cr	Max. (1 - F1) for different cr
ATUM (e)	0.0167789	0.0151211	0.0192655
SBEM (e)	0.0211602	0.0202507	0.0225245
SBEM (i)	0.0209373	0.0157152	0.0218698
[truncated: 1,447 more columns]
