# Supplementary material for: SynEM, automated synapse detection for connectomics
Source: eLife. 2017 Jul 14;6:e26414. doi: 10.7554/eLife.26414 (PMC5658066; doi:10.7554/eLife.26414)
Supplement: Figure 6—source data 1. — DOI: http://dx.doi.org/10.7554/eLife.26414.026 [file elife-26414-fig6-data1.xlsx]

## Sheet: Sheet1
Fig. 6b	Contactome - total contact area (μm2)
	Postsynaptic
Presynaptic	0	0	0	0	0	0	0	0	0	0	0.207371	0	0.0937492	0.113359	0	0	0.115207	0	0	0.0427942	0	0.176211	0	0	0.448233	0	0	0	0	0	0.900436	0.0286083	0	0	0	0	0	0.12845	0	0	0	0	0	0	0.482926	0	0	0	0.0426244
	0	0.101001	0	0	0	0	0	0.0291243	0.3085	0.3236	0	0.0749031	0	0	0	0	0.498866	0	0	0	0	0	0	0	0	0	0	0	0	0	0.388633	0	0	0	0	0	0.0871366	0.133732	0	0.212239	0	0	0.341365	0.337259	0	0	0	0.081099	0
	0	0.426408	0	0.196658	0	0	0	0	0	0	0	0.0323386	0	0.324543	0.656897	0	0	0	0	0	0.192308	0	0	0	0	0.0580918	0.308345	0	0	0	0	0.184087	0	0	0	0	0	0.374096	0	0	0	0	0.767689	0.126993	0	0	0	0.0177753	0.00379478
	0	0	0	0	0.320579	0	0.498072	0	0	0.201533	0	0	0	0	0	0.221163	0	0	1.75369	0	0.0490887	1.198	0	0.0414287	0.216021	0	0	0.670517	0	0	0	0.270227	0	0.577332	0.769672	0.934603	0	0	0.162662	0.620065	0	0	0.440675	0.948733	0.136107	0	0.0332602	0	1.88773
	0	0	0	0	0	0	0	0	0	0.32025	0.313583	0.330705	0	0.32025	0	0	0	0	1.07246	0	0	0	0	0	0.00941623	0	0	0	0	0	0	0.0782915	0	0.0396014	0.128432	0.333727	0	0	0.992878	0	0	0	0	0	0	0	0.0187704	0	0
	0	0.341438	0	0.572147	0.0840013	0	0	0	0	0	0.115554	0.17008	0	0.00948827	0	0	0	0	0.0414351	0.297659	0	0	0.562759	0	0	0	0	0	0	0.0656109	0	0	0	0	0	0	0	0	0.0407658	0	0	0	0	0	0	0	0.0754598	0.239742	0
	0	0.135615	0	0	0	0	0	0	0	0	0	0	0	0.173469	0	0	0	0	0	0	0	0	0.0286116	0	0	0	0	0.292332	0	0	0	0.195522	0	0	0	0	0	0	0	0	0	0	0	0	0	0	0	0.528811	0
	0	0	0	0	0	0	0.0564088	0	0	0	0	0	0	0	0	0	0.109947	0	0	0	0	0	1.24224	0	0.263838	1.53997	0	2.08739	0	0.16447	0	0	0	0	0	1.15648	0	0	0	1.55742	0	0	0.106122	0	0	0	0	0	0
	0	1.60686	0	0.499681	0	0	0.0480874	0	0.331161	0	0	0	0	0.0836864	0	0	0.0481926	0	0.34441	0	0.0384178	0.488651	0	0	0.735378	0.328942	0	0.0406853	0.0151581	0	0	0	0	0	0	0.694197	0	0	0	0	0.0843054	0	0.110885	0.621344	0	0	0.118467	0.204551	0
	0	0	0	0	0	0	0	0	0.105072	0.00836768	0	0	0	0	0	0	0.457719	0	2.46145	0	0	0.0157106	0	0	0.176547	0	0	0	0	0	0	0.483242	0.050007	0	0	0.149097	0	0	0	0	0	0	0.126883	0	0.0899096	0	0.0854936	0	0.25995
	0	1.01453	0	0	0	0	0	0	0	0	0	0	0	0.423542	0	0	0	0	0	0	0	0	0	0	0.0469749	0.0416534	0	0	0	0	0	0.336142	0	0	0	0	0	0.303713	0.0167243	0.676246	0	0.138962	0	0	0	0	0	0.390961	0
	0	0	0	0	0.146984	0.0974103	0	0	0	0.17372	0.780361	0	0.477892	0	0	0	0	0	0.276467	0	0	0	0	0	0	0.261367	0	0	0	0	0.863754	0	0	0	0	0	0.00213959	0	0.0627665	0.292315	0	0	0	0.929642	0	0	0	0	0
	0	0	0	0.542444	0	0.120494	0	0.1196	0	0	1.15423	0.0417606	0	0	0	0	0.0960598	0	0.970691	0	0.287578	0	0	0	0	0	0	0.013518	0	0	0.457176	0.806344	0.286151	0.102274	0	0	0	0	0	0.819879	0	0	0	0	0.158283	0	0.102178	0	0
	0	0	0	0	0	0.365192	0	0	0	0	1.35094	1.17461	0	0.0184589	0	0	0	0	0	0	0	0	0	0	0	0	0	0	0	0	0	0	0	0	0	0.0613521	0	0	0	0	0	0	0	0	0	0	0	0	0.14844
	0	0	0	0	0	0.172684	0	0	0	0	0.287318	0.61303	0	0	0	0	0	0.054572	0.147334	0	0.0526076	0	0	0.0603248	0	0	0	0	0	1.51352	0.611065	0	0.109649	0	0.172505	0	0	0.219433	0.0681175	0	0	0	3.24156	0	0	0	0	0	0
	0	0	0	0	0	0	0	0	0	0	0	0	0	0	0	0	1.01845	0	0	0	0.766656	0	0.0145514	1.31222	0	0	0	0.0715435	0.114079	0.157801	0	0.826291	0	0	0	0	0	0	1.35134	0	0	0	0	0	0	0	0.466769	0	0.0592501
	0	0	0	0	0	0	0	0.599231	0	0	0.116827	0	0	0.573517	0	0	0	0	0	0	0	0.410459	0	0	0	1.99582	0	0	0.350933	0	0.00621046	0.00050535	0.0657234	1.20282	0.124293	0	0	0.593766	0	0.438293	0	0	0	0.613494	0	0	0	0	0.338333
	0	0	0	0.122936	0.0580335	0	0	0	0	0.212176	0	0.59348	0	0.0450972	0	0	0.516831	0	0	0	0	0.0283762	0	0	0	0	0	0	0.0404735	0	0	0	0	0	0	0	0	0.891187	0	0	0	0	0	0	0	0	0	0.0118509	0
	0	0	0	0.0472348	0	0	0	0.0463678	0	0.412791	0.115181	0	0	0	0	0	0.00535793	0	0	0	0.974052	2.15382	0	0	0.0498812	0	0	0.634579	0	0	0	0	0	0	0	0.0781249	0	0	0	0	0	0	0	1.86479	0.326051	0	0	0	0
	0	1.22843	0	0.354651	0	0	0.59749	0.601759	0	0.0310791	1.20318	0	0	0	0	0	0.105344	0	0.482021	0	0	0	0.222761	0.214632	0.194762	0.0593495	0	0.102784	0	0	0	0	0.102922	0	1.04468	0.278944	0	0.348588	0.893794	0.227772	0	0	0.333076	0.759565	0.873238	0	1.13959	0	0.193415
	0.307394	0	0	0.146643	0	0.289813	0	0	0	0.5611	0.227249	0.165688	0.549416	0	0	0.0317961	0	0	0.244489	0	0.158557	0	0.332718	0	0.672684	0	0	1.04759	0.0956202	0.139699	0.0259756	0	0.532256	0	0.783754	0.532714	0	0	0.360876	0.243525	0.775215	0	1.80838	0.239697	0	0	0	0.142456	0
	0	0	0	0.183221	0	0	0	0	0	0	0	0	2.19526	0	0	0	0.338692	0	0	0	0.409692	0	0	0.50837	0	0.791488	0	0	0.123174	0.128585	0	0	0	0	0.503535	0	0	0	0	0	0	0	0	0	0	0	0	0	0
	0	0.175851	0.49539	0	0.15546	0	0	0	0	0	0.551025	0.248858	0.0750582	0	0	0	0.446112	0	0.35894	0	0	0	0	0	0.0842064	0.422852	0	0	0	0	0	0	0	0	0	0	1.5651	1.23106	1.07978	0.098064	0	0.542342	0	0	0	0	0	0.166713	0
	0	0	0	0	0.147434	0	0	0.204931	0	3.61614	0	0	0	0.655995	0.0742143	0	0	0	0.576162	0.687145	0	0.00683522	0	0	0	0	1.32804	0	0.468992	0	0	0	0	0	0	0	0.234027	0.028996	0	0.720546	0	0	0	0.412952	0	0	0.161456	0	0
	0	0.697493	0	0	0.900607	0	0	0.0241428	0.419993	0.602274	0.873413	0.0268603	0	2.70597	0.252603	0	0	0	2.66411	0.0278789	0	3.41535	0.253321	0	0.0414624	0	0	0	0	0	0	0	0	0.507595	0.0478348	0.0563833	0.432744	0.164714	0.00655245	0.798529	0	0	0	1.03351	0	0	0.026033	0.0738355	0.179673
	0.80202	0	0	0	0	0	0	0.0417394	0	0	0	0.242327	0	0.622133	0	0	0	0	0	0	0	0	0	0.321533	0.0005	0.403939	0	0.00190343	0	0.451713	0	0	0	0.170619	0	0	0	0	0	0	0	0	0	0	0	0	0.180311	0	0
	0	0	0	0	0	0	0	0	0	0.0150236	0	0	0	0	0	0	0	0	0	0	0.193129	0	0	0	0.19246	0	0	0	0	0	0	0	0	0	0	0	0	0.530284	0	0	0	0	0	0.023567	0.0703546	0	0.25078	0.0470949	0
	0	0	0.571981	0.219986	0	0	0	0	0	0	0	0	0	0	0	0	0	0	0	0	0	0	0	0	0	0	0	0	0.0804305	0.683129	0	0	0	0	0	0	0	0.0227629	0	0	0	0	0	0	1.23575	0	0.0117571	0	0
	0	0	0	0	0	0	0	0	0	0	0	0	0	0	0	0	0	0	0	0	0	0	0	1.14427	0	0.841257	0	0	0	0	0	0	0.823832	0.106146	0.25775	0	1.36135	0	0	0	0	0	1.23536	0	0	0	0	0	0.182417
	0.380876	0	0	0	0	0	0	0.136122	0	0	0.443265	0.693998	0	0.99798	0	0	0	0	0.760403	0	0	0.0696672	0	0	0	0.136909	1.29699	0	0.419077	0.244273	0	1.18036	0.338374	2.77512	0	0	0.0618348	0.13911	0	0.987449	0	0	0.0761437	0.825552	0	0	0.384248	0.158328	0.0780944
	0	0.52372	0.149623	0	0	0	0	0	0	0	0	0	0	0	0	0	0	0	0	0.869028	0	0	0	0	0	0	0	0	0	0	0	0	0	0	0	0	0	0	0	3.29234	0	0.347215	0	0.363759	0	0	0	0	0
	0	0.367261	0	0	0	0	0	2.14502	0	0	0.0782256	0	0	0	0	0.0544804	0	0	0	0	0	0	0	0	0	0	0	0	0.771505	0	0.486718	0.108133	0	0.128516	0.208996	0	0	0	0	0	0	0	2.14409	0.2364	0	0	0.0227125	0	0
	0	0.939349	0	0	0	0	0	0	0	0.51619	0	0.275916	0	0	0	0	0	0	0	0.00303167	0	0	0	0	0.211966	0.292464	0	0	0	0	0.0984269	0	0.285786	0	0	0	0	0	0	0	0	0	0.0395858	0	0	0	0.211382	0.144824	0
	0	0.746703	0	0	0	0	0	0	0	0	0.235261	0	0	0.0840559	0.0423713	0	0	0	0	0.283072	0	0	0	0.184368	0	1.00571	0	0	0.164967	0	0	0.348249	0	0.884063	0	0	0	0.0887287	0.199696	0	0	0	0	0	0	0	0	0	0.721106
	0	0	0	0.0587628	0.443492	0	0	0	0	0	0	0	0	0.401029	0	0	0	0	0	1.01033	0	0.411657	0	0.052258	0	0	0	0	0	0	0	0	0	0	1.22009	0	0	0	0	0.589231	0	0	0	0.213143	0	0	0.0711529	0.00366379	0.183006
	0	0.567116	0.112957	0	0	0	0	0	0	0	0	0	0	0	0	0	0	0	0	0	0	0	0	0	0.94217	0.923314	0	0	0	0	0	0	0	0	0	0	0.0539905	0.408769	0	0	0	0	0.185666	0	0	0	0	0.330741	0.00996063
	0	0	0	0.35326	0	0	0	0	0	0.942905	0.0243544	0	0	0	0	0	0	0	0	0	0	1.12586	0	0	0	0.0118757	0	0	0.417193	0	0	0	0	0	0	0	0.088832	0.612123	0.183942	0.291979	0	0	0	0.278243	0	0	0.759063	1.05556	0
	0	0	0	0	0	0	0.428464	0	0	0	0.0578976	0	0.0840464	0	0	0.222808	0	0	0.114169	0	0	0.357226	0	0	0.0731364	0	0.834945	0.357271	0	0.515902	0	0.72719	0	0.0108844	0.234214	0.551823	0	0.440452	0.161413	0.00200097	0	0	0.153107	0	0	0	0.163217	0	0.402928
	0.36075	0.332336	0	0	0.67642	0	0	0	0	0	3.14878	0	0.54572	0	0.37839	0	0.281936	0	0	0	0	0.348633	0	0	0	0.839003	0	1.25166	0.0637068	0	0	3.71112	0	0	0.0500603	0	0.163134	0	0.0192259	0	0	0	1.98124	0.395942	0.251603	0	1.05136	0.618132	0.0367079
	0	0.650431	0	0.906803	0	0	0	0	0	0	0	0	0	0.135331	0	0	0.852502	0.160595	0.773367	0	0	0	1.37077	0.124373	0	0.0570449	0	0	0	0	0	0	0.455034	0.113462	0	0	0	0.221137	0.488485	0.946733	0	0	0	0	1.7643	0	0	0.915034	0
	0	0	0	0	0	0	0	0	0.413125	0	0	0	0	0.0101665	0	0	0	0	0.0260132	0	0.261392	0	0	0	0	0	0	0.0466852	0	0	0	0.136547	0	0	0.266852	0	0	0	0	0	0	0	0.0100528	0	0	0	0.0133076	0	0
	0	0	0.095074	0	0	0.116415	0	0.0735379	0	0	0.879616	0	0	0	0	0	0	0	0	0	0	0	0	0	0	0.399185	0	0	0	0	0	0.4861	0.37054	0.085026	0.059335	0	0	0.152963	0	0	0	0	0.332118	0	0	0	0.0566166	0.0005	0
	0	0	0	0	0.299493	0	0	0	0	0	0.115441	0	0	0	0	0	0	0	0	0.9491	0	0.0609584	0	0	0	0	0	0	0	0	0	0	0	0	0	0	0	0	0	0	0	0.172174	0	0.239679	0.144647	0.100551	0.140701	0.324386	0.0260218
	0	0.501442	0	0	0	0	0	0	0	0	0.272292	0	0	0	0.156389	0	0	0	0	0	0.249438	0	0	0	0	0	0	0	0	0	0	0.0562404	0.313178	0	0	0	0	0	0	0	0	0	0	0	0	0	0.0855221	0	0
	0	0	0	2.56215	0	0	0	0	0	0	0	0.401565	0.621316	0	0	0.350914	0	0	0	0.479584	0	0	0	0.64164	0	0	0.705999	0.0818408	0.773053	0.436216	0	0	0	0	4.61103	0	0	0.0125701	0	0.0136568	0	0	0.123767	0.285202	0	0.922884	0	1.08595	0.00510011
	0	0	0	0	0	0.0393873	0.298892	0.163956	0	0.948706	0.153964	0.208382	0	0.0448685	0	0	0	0	0.349668	0	0	0	0	0	0.993717	0	0.211023	0.39804	0.0933688	1.01252	0	0.422798	0.473303	0	0	0.00813929	0	0	0.0931626	0.101822	0	0	0.29287	0	0	0	0	0	0
	0	0.0756195	0	0	0.250705	0	0	0.140309	0	0	1.51819	0	0	0	0	0	0	0	0	0	0	0	0	0.501109	0.729409	1.03918	0	0	1.04389	0.196959	0.0567224	0	0	0	0	1.0245	0.0435259	0	0	0	0	0	0	0	0.175747	0	0	0.450461	0.801465
	0	0	0	0	1.09894	0	0	0	0	0	0.209056	0.0631769	0	0.0280309	0	0	0.184827	0	0	1.77761	0	0.257293	0.302511	0	0	0	0	0	0	0	0	0	0.225622	0	0	0	0	0	0.196922	0.00401655	0	0.0211168	0	0.164012	0	0	0	0	0
	0	0	0	0	0	0	0	0	0	0	0.421404	0	0	0.136907	0	0	0	0	0	0	0	0	0	0	0	0	0	0	0.0615235	0	0	0.569861	0	0	0.507123	0	0	0.359746	0	0.97046	0	0	0	0	0	0	0.47819	1.19243	0.201766
	0	0	0	0	0	0.000947532	0	0.0601162	0.0902482	0	0	0.76865	0	0	0	0	0	0	0	0	0.170463	0	0	0	0.318477	0.21894	0	0	0	0	0.149424	0	0	0.640338	0.409553	0	0.00190746	0	0.132107	0.246712	0	0	0	0	0	0	0	0.252258	0
	0	1.14125	0	0	0	0	0	0	0	0.123226	0.220912	0	0	0.390363	0	0	0	0	0	0	0	0.466835	0	0.0605463	0.505794	0	0	0	0	0	0	0.44453	0.0178378	0.452421	0	0	0	0.100743	0.394666	0	0	0	0	0	0	0	1.01473	0.495701	0.0483668
	0	0	0	0	0	0	0	0.00572301	0	0	0	0	0	0	0	0	0	0	0	0	0	0	0	0	0	0	0	0	0	0	0	0.499099	0	0	0.475235	0	0	0.213888	0	0	0	0	0	0	0	0	0.106893	0	0.286295
	0	0.259628	0	0	0	0	0	0	0	0	0	0	0	0	0	0	0	0	0	0	0.682709	0	0	0	1.42366	0.965404	0	0	0	0	0	0.0755953	0	0.835811	0	0	0	0	0	0	0	0	0	0.438927	0.162888	0	0	0	0
	0	0.143924	0	0	0	0.117434	0.345312	0.533731	0	0.0850843	0.544615	0.405842	0	0.0184634	0	0	0.650762	0	0	0	0.165045	0.901602	0	0.638729	0	0	0	0.0586802	0	1.10465	0	0	0	0.0962268	0.0822686	0	0.0152019	0.0428149	0.311837	0.775309	0	0	0.120615	1.08712	0.822671	0	0	0.111794	0.358529
	0	0	0	0	0.0579761	0	0	0	0.0862949	0	0.249658	0	0	0	0	0	0	0	0	0	0.0967575	0	0	0	0.384876	0	0.379418	0	0	0.247654	0.263679	0.218027	0	0	0.757113	0	0	0.339717	0	0.0389796	0	0	0.727123	0	0	0	0	0.174259	0.317737
	0	0	0	0	0	0	0	0	0	0	0	0.594483	0	0.280538	0	0	0.0550709	0	0	0	0	0	0	0.314139	0	0	0	0	0	0	0	0	0	0	0.281161	0	0	0	0	0	0	0	0	0.468201	0	0	0	0	0
	0	0	0	0	0	0	0	0	0	0	0	0	0	0.0318466	0	0	0	0	0	0	0	0	0	0	0	0	0.897599	0	0	0	0	0	0.0995368	0	0	0	1.45509	0	0	0	0	0	0	0	0	0	0	0.0850337	0
	0	0	0.492212	1.34939	0.398979	0.0181477	0	0	0.12954	0	0.756228	0.102438	0	0	0	0	0.887853	0	1.17018	0.234386	0	0.73436	2.90786	0	0	0	0	0.915943	0	0	0	0.365494	0.0216776	0	0	0	0.375765	0.0514543	0	1.23015	0	0	0.333139	3.49123	0.504957	0.682474	0.393203	0.55196	0.362405
	0	0	0.168825	0.644202	0	0	0	0.578517	0	0	0	0	0	0	0	0	0	0	0	0	0.389083	0	0	0	0.364305	0.288733	0	0.50862	0.312744	0.591471	0.652326	0	0	0.245041	0	0	0	0	0.0993008	0	0	0	0	0.504911	0.0323308	0	0.68037	0.450517	0
	0	0	0	0.224735	0	0	0	0.0120306	0	0	0.178478	0	0.126546	0	0	0	0.0452378	0	0.0270102	0	1.54213	0	0	0	0	0.163248	0	0	0.082235	0.0805837	0.474329	0	0.0293959	0	0	0	0	0.708452	0	1.47027	0	0	0	0	0	0	0	0	0
	0	0	0	0	0.680006	0	0	0	0	0	0.164534	0	0.0606208	0.124331	0.268278	0	0	0	0	0	0	0	0	0	0	0.0581245	0.0166848	0	1.01818	0	2.19586	0.0560461	0	0.378566	0.648016	0	0	0.161861	0	0.339516	0	0	0.926659	0	0	0	0	0	0
	0	0	0	0	0	0	0	0	0	0	0.951731	0.744683	0	0	0	0	0	0	0.0525822	0	0	0.117253	0	0	0	0	0	0	0	0	0.06075	0	0	0.121587	0	0	0.519597	0.0867207	0.377909	0.311086	0	0	0	0	0	0	0	0	0
	0	0.151122	0	0	0.0605426	0.29855	0	0	0.452317	0	1.51074	0	0	0.402656	0	0	0	0	0.173229	0	0	0	0	0	0	0.0791515	0	0	0	0	0	0.505153	0.0153552	1.19079	0.124169	0	0.678591	0	0	0.346265	0	0	0	0	0	0	0.531254	0.00560139	0
	0	0	0	0	0	0	0	0	0	0.187572	0	0	0	0	0	0	0.496425	0	0	0	0.0247373	0	0.0424834	0	0	0	0	0.5258	0	0	0	0.140002	0.131726	0.0983484	0	0	0.475179	0	0	0	0	0	0.13681	0	0.0513357	0	0.705016	0.60233	0.0460008
	0	0.131306	0	0	0	0.278524	0	0	0.573998	0.138375	0	0	0	0.795073	0	0	0	0	0.301496	0	0	0.52494	0.118515	0.145189	0.323159	1.04994	0	0	0	0	0.197102	0	0	0.0900886	0	0.00578737	0.413236	0.68959	0.335645	0.316658	0.357287	0	0.61301	0	0.308347	0	0.0275503	0.013172	0.0801607
	0	0	0	0	0	0	0.281135	0	0.134839	0.851699	0	0	0	0	0	0.0300813	0	0	0.149594	0	0	0.146069	0.704723	0	0	2.09771	0	0	0	0	0	0.10875	0.697468	0	0.254861	0	1.4902	0.202577	0.357973	2.3303	0	0	0.18346	0	0.0827368	0	0	0	0
	0	2.84257	0	2.62557	1.25972	0.689675	0	0.0767294	0	0.386645	0.291459	1.02561	2.03982	0.04324	0	0	3.72802	0	0	0.640247	0.587379	0.768157	0.554883	1.46465	0.916932	2.36522	0.224081	1.21399	3.54638	0.852138	5.09687	0	0.152296	1.08451	2.65668	0.0476869	0	1.75811	0	0.462667	0	0.649428	5.27074	5.26646	0	0	2.26786	2.25421	0.556106
	0	0	0	0	0	0	0	0	0	0	0.0260317	0	0	0.331556	0	0	0.372732	0	0	1.32031	0	0	0.0377052	0	0.0694973	0	0	0	0	0	0.3149	0	1.1533	0	0	0	0	0.360166	0	0	0	0	0	0	0	0	0.014045	0.36172	0
	0	0	0	0	0	0	0	0.00251776	0.678564	0	0	0	0	0	0	0	0.362572	0	0	0	0.167922	0	0	0.00189506	0	0	0	0	0	0	0	0.0857137	0.299182	0	0.0974628	0	1.3972	0	0	0.0602014	0	0	1.96542	0	0	0	0	0.483121	0
	0	0	0	0	0	0	0	0	0	0	0	0.532127	0	0.134771	0	0	0	0	0	0	0	0	0	0	0	0	0	0	0	0	0	0.0110973	0	0.150317	0.177904	0	0	0	0	0.0202219	0	0	0	0	0	0	0.0199977	0.382617	0
	0	0	0	0	0	0	0	0	0	0	0	0	0	0.527262	0	0	0	0	0	0.204786	0	0.096851	0	0	0	0.0523295	0	0	0	0	0	0	0	0	0	0	0	0	0.684499	0	0	0.481789	0.333413	0	0	0.501867	0.10981	0.276347	0.176889
	0	0	0	0	0.0812542	0	0	0	0	0	0	0	0	0	0	0	0	0	0	0.740235	0	0	0	0	0	0.111264	0	0	0	0	0	0	0	0	0	0	0.0519707	0	0.257943	0	0	0	0	0.214012	0	0	0.531301	0.276994	0.35201
	0	0.0975802	0	0	0	0	0	0	0	0	0	0	0	0.307947	0	0.0252994	0	0	0	0	0	0	0.155275	0	0.323268	0.141139	0	0	0	0	0	0	0	0.193104	1.27826	0.0805291	0	0.083063	0	0	0	0	1.11773	0	0	0	0	0	0
	0	0	0	0	0	0	0	0	0	0.119554	0.532679	0	0	0.00050535	0	0	0	0	0	0.848938	0	0	0	0.172495	0.105209	0	0	0	0	0	0	0	0.0213325	0.0623408	0.00703348	0.151828	0.0463137	0	0	0.0178581	0	0	0	0.00113704	0	0	0	0	0
	0	0	0	0.224691	0.0435792	0	0	0	0	0	0	0.320003	0	0.476847	0.379997	0	0	0	0	0	0.183876	0	0	0.0338799	0	0	0	0.263669	0	0	0	0	0	0	0.169979	0	0	0	0	0	0	0	0.679789	0	0	0	0.135989	0.648993	0.379246
	0	0.207154	0	0	0	0	0	0	0	0	0	0.125021	0	0	0	0	0	0.307276	0	0.0381922	0	0	0	0	0.368236	0.190241	0	0	0	1.08296	0	0	0	0.674807	0	0	0.41146	0	0.329519	0.257638	0	0	0.322168	0	0	0	0	0	0.17851
	0	0	0	0	0	1.2829	0.487038	0	0	0.348232	0	0	0	0	0	0	0	0	0.0243062	0	0	0	0	0.335869	0.230447	0	0	0	0	0	0.0574519	0	0	0	0.0735191	0	0	0	0	0	0	0	0	0.560267	0	0	0	0	0
	0	0.154135	0	0	0	0.336133	0	1.00343	0.445857	0	0	0	0	0.768252	0.174457	0	0.15355	0	0	0	0.0180764	0	0	0.277348	0	0.747387	0.0139386	0	0	0.176952	0	0	0.890826	0	0	0.0103049	0	0	0	0.76279	0.653346	0	0	0	0.258565	0	0	0	0.108371
	0.222925	0.118243	0	0	0	0	0	0.417204	0	0	0.045805	0	0.565316	0.245942	0.0162551	0	0.157937	0	0.13308	0	0.142695	0	0.590748	0	0.199384	0.544899	0	0.352495	0	0	0	0.143968	0	0.0966151	0.0459925	0	0.256618	0.117899	0.181182	0	0	0	0.187981	0	0.269965	0	0.439058	0.341818	0.242151
	0	0	0	0	0	0	0	0.113688	0	0	0.279508	0.353645	0.33744	0	0	0	0.0387099	0	0	1.24971	0	0	0.293784	0.376671	0	0.408544	0.677247	0.291746	0	0	1.90698	0	0	0	0	0	0	0	0.764194	0	0	0.390052	0	0	0	0	0.109468	0.809956	1.15254
	0	0.1586	0	0	0	0	0	0	0.215762	0.230468	0	0	0	0.127997	0	0	0.229404	0	0	0	0	0	0	0.429936	0.278611	0	0	0	0.174511	0.19663	0.158621	0	0.215644	0	0	0	0	0	0	0	0	0	0	0	0	0.146603	0	0	0
	0	0	0	0	0.157517	0	0.222167	0	0.231982	0	0	0	0	0	0	0.151727	0	0	0.247781	0	0	0	0	0	0.635946	0.854342	0	0	0	0	0	0.315821	0	0	0.295683	0.312999	0	0.352408	0	0.996071	0	0	0.423858	0	0	0	0	0.604204	0
	0	0	0	0	0	0	0	0	0	0	0	0	0	0	0	0	0	0	0	0	0	0.207161	0	0	0	0	0	0	0.107006	0	0	0	0	0	0	0	0	0	0	0	0	0	0	0	0	0	0	0	0
	0	0	0	0	0	0	0	0	0	0	0	0	0	0	0	0	0	0	0	0	0	0	0.249032	0.00672778	0	0	0	0.267705	0	0	0.33138	0	0	0.249281	0.500438	0	0.135536	0.398248	0	0	0	0	0	0	0	0	0	0	0
	0	0	0	0	2.20079	0	0.0130609	0	0.109859	0	0	0	0	0.00107387	0	0.15917	0.252035	0	0.131752	0	0.121844	0.846027	0	0.0609407	2.66474	0.0637406	0.0760383	0.104804	0.293343	0.244895	0	0.808868	1.68533	0.301818	0.23697	0.178042	0	0.079914	0.417226	0.556152	0	0	0.153418	0.479218	0.277142	0	0.361061	0	0.939453
	0	2.54277	0	0.263933	0	0	0	0	0	0.451583	1.29741	0.332536	0	0.644218	0	0.891911	0	0.45525	0	0.110625	0	0	0.216879	0.758572	2.02729	1.69179	0	0.342754	0.636843	0	0	0.710055	0	0.69308	0.0466404	0	1.83587	4.15064	2.41426	0.186878	0	0	0	0.818942	1.14944	0	1.05255	0.850735	0.0314881
	0	0.619615	0	0.0286155	0	0	1.23871	0.123898	0.303711	1.19279	0.741123	0	0	0	0	1.39824	2.04341	0	1.45228	0	0.616541	0	1.14388	0	0.416318	0.290233	0.0678009	0.916832	0	0	1.18281	1.15525	0.298301	0.272891	0.0365537	0.258614	1.0809	0.837736	1.21344	1.31153	0	0	0.200519	0.993111	0.497834	0	0.733764	0.631225	0.372459
	0	0.742098	0	0	0	0	0.499231	0.689664	0	0.603841	0.158149	0	0.65129	2.56191	0.234286	0	0.142788	0	0.291593	0	0.395709	0.0809226	0	0.219002	0.703241	0.411886	0.407538	0.0626727	0.583695	0	0	0.581626	0	0	0	1.12705	0.9186	0.159916	0.140194	0.618576	0	0	1.00236	0.0462214	0	0	0.829945	0	0.841753
	0	0	1.1946	0.326939	0.129163	0	0	0.782336	0.68444	0.539245	0	0.194103	0.265218	0	1.28199	1.31214	0.0005	0	0.148667	0	0.321215	0	0.101888	0.325398	2.49899	2.69769	0.158323	0.431172	0.781862	0.799735	0.16199	0.164192	0	0.243122	0.107878	0.919346	0	0.617191	0.189445	0.432987	0	0	0.86972	0.895192	0.404811	0	0.763468	0.483888	0.151626
	0.245207	0.753542	0	0	0	0	0	0.152091	0	0	0.0995793	0.990564	0	0	0.112547	0.0459807	0.543676	0.0545209	0	0.606288	0	0	0	0.386901	0	0.188058	0	0.737385	0	0.167553	0.24046	0.240616	0.16507	0.331678	0	0	0.274	0.0689802	1.17527	0	0	0	0.240366	0.555637	0.187711	0	0.273851	0.983537	0.483152
	0.0788479	0.121653	0	0	0	0.24752	0.0948716	1.07609	0	0.509705	0	0.402937	0.165491	0.123968	0	0	0	0	0.949822	0	0.530114	0	0.233398	0	1.43696	0	0	0	0	0.680855	1.68249	1.07678	0.39005	0	0	0	0.180823	0.169644	1.21372	0.41815	0	0	0.289708	0.385586	0.498624	0	0	0.613969	0.874921
	0	1.4447	0	0	1.54351	0	0	0.097757	0.610504	1.08072	0.254206	0	0	0.0924818	0	0.0804404	0.0529677	0	0	1.11477	0	0.238404	0.475439	0	1.84877	1.11303	0	0	0	0	0	0.991112	0	0	0	0.452397	1.93556	1.71534	1.10385	1.08479	0	0	0.328392	0.618053	0	0	0	1.31398	0.551586
	0	0	0	0	0	0	0.211702	0	0	0	0.418284	0	0	0	0	0.186103	0.0137063	0	0.440007	0	0.972057	0	0.0972549	0.0144463	1.50963	1.26408	0.0257757	0	0.476876	1.67235	1.019	0.370998	0	1.57282	1.01231	0	0	0.234067	0.242644	0.520795	0	0	0.207891	1.38651	0.078043	0	0	0.613006	0.887026
	0	0.502319	0	0.475501	0.662628	0.719802	0.669846	0	0	0	0.0005	0	0.233183	0.41078	2.27675	0	0	0	1.01219	1.07603	0.594518	0	0	0	0.488773	0.247234	0	0.796059	0.240052	1.0211	0	0.132249	0	0	2.48955	0	0	0	0.721107	0.0364794	0	0	0.219773	0	0.48503	0.0247733	0.246518	0	1.61831
	0	0.91144	0.279546	0	0.00417137	0.0181897	0	0	0	0.876426	0.463308	0	1.77646	0.260661	0	0	0.0309697	0.275319	0	2.58442	0	0.147987	0	0.291399	0.330983	0.698249	0.0495643	0	0	0	0	1.08678	0	0	0	0	0	1.067	1.24864	0.137105	0.188592	0	0.0866476	0.740647	0.198872	0	0	2.44814	1.73679
	0	0.796804	1.04643	0.336051	0.744815	1.79654	0	1.99321	0.71217	2.57553	1.46383	4.1435	0.28101	1.9858	1.20054	1.21293	1.16875	0.00799618	2.99122	3.70982	1.74364	0.759661	0.35677	3.06612	0.00411296	2.9058	0.130436	2.44479	2.9604	0	0.0459355	0.671633	4.68873	0	1.30043	1.50906	1.301	3.88828	1.53794	1.00995	0	0.542883	3.67995	0.857135	2.61456	0.558344	2.88893	2.40978	4.69716
	0	3.31589	0	0	2.33093	0.928922	0	1.84519	0.180883	0.220292	1.0831	0.4709	0.701944	0	1.79327	0.288937	3.03148	0	0	3.51856	1.28532	0.383075	0	2.46648	3.55267	7.31319	3.33636	2.18451	0.485575	1.36198	0.789267	1.59471	0	0.428361	2.0492	0.49166	0.621122	2.73716	1.24535	0.587755	0	0	4.74084	1.76115	1.01082	0	0.594958	0.0477555	1.08169
	0	1.4362	1.67306	1.07565	0	0	0.74979	0	1.25207	0.866979	4.36988	0.200723	0	2.85382	0.150808	0.248754	1.50572	0.0352897	2.77689	0	0	2.17861	1.35765	1.69776	1.52936	1.18601	0.753222	0	0	1.66398	0.159883	5.41568	1.21255	9.88375	0.0254753	2.27526	0.489742	2.16784	0.0958584	4.60476	0.538542	0.316806	2.0662	0.362463	3.83705	0	2.80777	0.91103	0
	0	0	0	0	0.173026	0	0	0	0.130267	0	0.773612	0.351981	3.1027	0	0	0	0	1.1715	1.4622	1.51888	0.485714	0.688286	0.449661	1.56937	4.77765	7.55939	0	0	4.20893	2.40402	3.16517	0.819693	0	0.760542	0.0869277	0.0561599	0	2.14573	0.346456	1.29721	0	0.513907	0.990244	0	0	0	1.11536	1.30498	2.41871
	0	5.51375	1.61179	0.105541	1.01496	3.73234	0	0.118233	2.0399	0.392973	0.964237	0.635994	3.40259	2.1122	3.24482	0.115856	3.97737	0	0	0.750025	0	1.49303	2.32113	5.47019	4.52492	5.79131	0	1.89185	2.81468	3.105	4.52567	0.262187	0.983597	2.25514	2.56709	7.25538	0.607578	7.59854	0.792991	1.46512	2.92175	0.282128	1.00148	3.80034	1.0834	1.46506	8.92481	4.10946	1.09669
	0	5.28496	1.29754	1.14169	0.272782	0.568858	0.0749537	1.69162	0	0.273508	0.830807	0	0	1.97065	0	0	5.05397	0	0.766846	0	0	0	0.678807	0.10595	0.786039	1.02881	0	2.08731	3.23254	1.07862	2.77691	0.556095	0	2.10636	1.6313	0	0.345284	3.30535	1.8243	0.291206	0	0	0.412528	0.104158	5.46255	0	0.273738	3.10524	1.78774
	0	0.153982	0	0	0	0	0	0	0	0.447162	0	0	0.336308	0	0.708646	0	0	0.858107	0	0	0	0.240024	0	1.90415	0.421888	2.60083	0	0	0.782398	0	0.0163075	1.37551	1.63507	1.94374	0	0.118378	0.701092	0.759889	0.250047	0	0	0	0	0	1.76276	0	0	1.69685	0
	0	0.585947	0	0.54356	0.560266	0	0	0	0	0	1.93292	1.11007	0.484741	0	0	0.73037	2.09563	0	1.43629	0	2.08059	0.682861	0.165399	0	0	0.895995	0	0	1.38015	0.53196	2.16558	4.24382	2.63978	0.444534	1.93921	1.80701	1.58158	0.00257953	0	0.11562	1.35378	0	0.24108	0	4.60492	0	2.37287	1.45256	5.07256
	0	0.404579	0	0.0667107	1.45033	0	0	0	1.66352	0.254283	0.371908	0.125543	1.20534	1.92123	1.97982	0	1.31422	0.523313	0	0	0	0.834014	0.781723	0.526711	1.84543	5.40144	0	1.41415	1.96769	0	0.942014	0	2.78832	0.976847	0	0.735425	0.601887	2.21702	1.41729	0	0	0.588914	0.0799199	0.883743	0	1.87562	0.319788	0.914711	0.250765
Fig. 6c	Weighted connectome - number of synapses (#)
	Postsynaptic
Presynaptic	0	0	0	0	0	0	0	0	0	0	0	0	0	0	0	0	0	0	0	0	0	0	0	0	0	0	0	0	0	0	0	0	0	0	0	0	0	0	0	0	0	0	0	0	0	0	0	0	0
	0	0	0	0	0	0	0	0	0	0	0	0	0	0	0	0	0	0	0	0	0	0	0	0	0	0	0	0	0	0	0	0	0	0	0	0	0	0	0	0	0	0	0	0	0	0	0	0	0
	0	0	0	0	0	0	0	0	0	0	0	0	0	1	0	0	0	0	0	0	0	0	0	0	0	0	1	0	0	0	0	0	0	0	0	0	0	0	0	0	0	0	1	0	0	0	0	0	0
	0	0	0	0	0	0	1	0	0	0	0	0	0	0	0	0	0	0	1	0	0	0	0	0	0	0	0	1	0	0	0	0	0	0	0	0	0	0	1	0	0	0	0	0	0	0	0	0	4
	0	0	0	0	0	0	0	0	0	0	0	0	0	0	0	0	0	0	1	0	0	0	0	0	0	0	0	0	0	0	0	0	0	0	0	1	0	0	0	0	0	0	0	0	0	0	0	0	0
	0	0	0	1	0	0	0	0	0	0	0	0	0	0	0	0	0	0	0	0	0	0	0	0	0	0	0	0	0	0	0	0	0	0	0	0	0	0	0	0	0	0	0	0	0	0	0	0	0
	0	0	0	0	0	0	0	0	0	0	0	0	0	0	0	0	0	0	0	0	0	0	0	0	0	0	0	0	0	0	0	0	0	0	0	0	0	0	0	0	0	0	0	0	0	0	0	0	0
	0	0	0	0	0	0	0	0	0	0	0	0	0	0	0	0	1	0	0	0	0	0	0	0	0	0	0	0	0	0	0	0	0	0	0	0	0	0	0	1	0	0	0	0	0	0	0	0	0
	0	4	0	0	0	0	0	0	0	0	0	0	0	0	0	0	0	0	0	0	0	0	0	0	0	1	0	0	0	0	0	0	0	0	0	0	0	0	0	0	0	0	0	2	0	0	0	1	0
	0	0	0	0	0	0	0	0	1	0	0	0	0	0	0	0	1	0	0	0	0	0	0	0	0	0	0	0	0	0	0	0	0	0	0	0	0	0	0	0	0	0	0	0	0	0	0	0	1
	0	1	0	0	0	0	0	0	0	0	0	0	0	0	0	0	0	0	0	0	0	0	0	0	0	0	0	0	0	0	0	0	0	0	0	0	0	0	0	0	0	0	0	0	0	0	0	0	0
	0	0	0	0	0	0	0	0	0	0	0	0	0	0	0	0	0	0	0	0	0	0	0	0	0	0	0	0	0	0	1	0	0	0	0	0	0	0	0	1	0	0	0	0	0	0	0	0	0
	0	0	0	1	0	1	0	0	0	0	0	0	0	0	0	0	0	0	1	0	0	0	0	0	0	0	0	0	0	0	0	1	0	0	0	0	0	0	0	0	0	0	0	0	0	0	0	0	0
	0	0	0	0	0	1	0	0	0	0	1	0	0	0	0	0	0	0	0	0	0	0	0	0	0	0	0	0	0	0	0	0	0	0	0	0	0	0	0	0	0	0	0	0	0	0	0	0	0
	0	0	0	0	0	0	0	0	0	0	0	0	0	0	0	0	0	0	0	0	0	0	0	0	0	0	0	0	0	0	0	0	0	0	0	0	0	0	0	0	0	0	2	0	0	0	0	0	0
	0	0	0	0	0	0	0	0	0	0	0	0	0	0	0	0	0	0	0	0	0	0	0	0	0	0	0	0	0	0	0	0	0	0	0	0	0	0	0	0	0	0	0	0	0	0	1	0	0
	0	0	0	0	0	0	0	0	0	0	0	0	0	0	0	0	0	0	0	0	0	0	0	0	0	0	0	0	0	0	0	0	0	0	0	0	0	1	0	1	0	0	0	0	0	0	0	0	1
	0	0	0	0	0	0	0	0	0	0	0	0	0	0	0	0	0	0	0	0	0	0	0	0	0	0	0	0	0	0	0	0	0	0	0	0	0	0	0	0	0	0	0	0	0	0	0	0	0
	0	0	0	0	0	0	0	0	0	0	0	0	0	0	0	0	0	0	0	0	0	0	0	0	0	0	0	0	0	0	0	0	0	0	0	0	0	0	0	0	0	0	0	1	0	0	0	0	0
	0	1	0	0	0	0	2	0	0	0	0	0	0	0	0	0	0	0	0	0	0	0	0	0	1	0	0	0	0	0	0	0	1	0	1	0	0	1	0	0	0	0	0	1	1	0	0	0	1
	0	0	0	0	0	0	0	0	0	0	0	0	0	0	0	0	0	0	1	0	0	0	0	0	0	0	0	0	0	0	0	0	0	0	3	0	0	0	0	0	0	0	1	0	0	0	0	0	0
	0	0	0	0	0	0	0	0	0	0	0	0	4	0	0	0	0	0	0	0	1	0	0	0	0	0	0	0	0	1	0	0	0	0	0	0	0	0	0	0	0	0	0	0	0	0	0	0	0
	0	0	1	0	0	0	0	0	0	0	0	1	0	0	0	0	0	0	0	0	0	0	0	0	1	1	0	0	0	0	0	0	0	0	0	0	0	0	0	0	0	0	0	0	0	0	0	0	0
	0	0	0	0	0	0	0	0	0	1	0	0	0	0	0	0	0	0	1	2	0	0	0	0	0	0	0	0	0	0	0	0	0	0	0	0	0	0	0	0	0	0	0	1	0	0	0	0	0
	0	0	0	0	0	0	0	0	0	0	0	0	0	6	0	0	0	0	2	0	0	2	0	0	0	0	0	0	0	0	0	0	0	0	0	0	1	0	0	0	0	0	0	2	0	0	0	0	0
	0	0	0	0	0	0	0	0	0	0	0	0	0	0	0	0	0	0	0	0	0	0	0	0	0	1	0	0	0	1	0	0	0	0	0	0	0	0	0	0	0	0	0	0	0	0	0	0	0
	0	0	0	0	0	0	0	0	0	0	0	0	0	0	0	0	0	0	0	0	0	0	0	0	1	0	0	0	0	0	0	0	0	0	0	0	0	0	0	0	0	0	0	0	0	0	0	0	0
	0	0	1	0	0	0	0	0	0	0	0	0	0	0	0	0	0	0	0	0	0	0	0	0	0	0	0	0	0	1	0	0	0	0	0	0	0	0	0	0	0	0	0	0	0	0	0	0	0
	0	0	0	0	0	0	0	0	0	0	0	0	0	0	0	0	0	0	0	0	0	0	0	0	0	0	0	0	0	0	0	0	0	0	0	0	0	0	0	0	0	0	0	0	0	0	0	0	0
	0	0	0	0	0	0	0	0	0	0	0	0	0	0	0	0	0	0	0	0	0	0	0	0	0	0	0	0	0	1	0	0	0	0	0	0	0	0	0	0	0	0	0	1	0	0	0	0	0
	0	0	0	0	0	0	0	0	0	0	0	0	0	0	0	0	0	0	0	0	0	0	0	0	0	0	0	0	0	0	0	0	0	0	0	0	0	0	0	0	0	0	0	0	0	0	0	0	0
	0	1	0	0	0	0	0	0	0	0	0	0	0	0	0	0	0	0	0	0	0	0	0	0	0	0	0	0	0	0	0	0	0	0	1	0	0	0	0	0	0	0	0	0	0	0	0	0	0
	0	0	0	0	0	0	0	0	0	0	0	0	0	0	0	0	0	0	0	0	0	0	0	0	0	0	0	0	0	0	0	0	0	0	0	0	0	0	0	0	0	0	0	0	0	0	0	0	0
	0	0	0	0	0	0	0	0	0	0	0	0	0	0	0	0	0	0	0	0	0	0	0	0	0	0	0	0	0	0	0	0	0	0	0	0	0	0	0	0	0	0	0	0	0	0	0	0	0
	0	0	0	0	0	0	0	0	0	0	0	0	0	0	0	0	0	0	0	2	0	0	0	1	0	0	0	0	0	0	0	0	0	0	0	0	0	0	0	0	0	0	0	0	0	0	0	0	0
	0	0	0	0	0	0	0	0	0	0	0	0	0	0	0	0	0	0	0	0	0	0	0	0	0	0	0	0	0	0	0	0	0	0	0	0	0	0	0	0	0	0	0	0	0	0	0	0	0
	0	0	0	0	0	0	0	0	0	1	0	0	0	0	0	0	0	0	0	0	0	0	0	0	0	0	0	0	0	0	0	0	0	0	0	0	0	0	0	0	0	0	0	1	0	0	1	0	0
	0	0	0	0	0	0	0	0	0	0	0	0	0	0	0	0	0	0	0	0	0	0	0	0	0	0	0	0	0	0	0	0	0	0	0	0	0	0	0	0	0	0	0	0	0	0	0	0	0
	1	0	0	0	1	0	0	0	0	0	0	0	0	0	2	0	1	0	0	0	0	0	0	0	0	0	0	1	0	0	0	0	0	0	0	0	0	0	0	0	0	0	1	0	0	0	3	0	0
	0	0	0	0	0	0	0	0	0	0	0	0	0	0	0	0	0	0	1	0	0	0	0	0	0	0	0	0	0	0	0	0	0	0	0	0	0	0	0	1	0	0	0	0	0	0	0	0	0
	0	0	0	0	0	0	0	0	0	0	0	0	0	0	0	0	0	0	0	0	0	0	0	0	0	0	0	0	0	0	0	1	0	0	0	0	0	0	0	0	0	0	0	0	0	0	0	0	0
	0	0	0	0	0	0	0	0	0	0	0	0	0	0	0	0	0	0	0	0	0	0	0	0	0	1	0	0	0	0	0	0	0	0	0	0	0	0	0	0	0	0	0	0	0	0	0	0	0
	0	0	0	0	0	0	0	0	0	0	0	0	0	0	0	0	0	0	0	0	0	0	0	0	0	0	0	0	0	0	0	0	0	0	0	0	0	0	0	0	0	0	0	0	0	0	0	0	0
	0	1	0	0	0	0	0	0	0	0	0	0	0	0	0	0	0	0	0	0	0	0	0	0	0	0	0	0	0	0	0	0	0	0	0	0	0	0	0	0	0	0	0	0	0	0	0	0	0
	0	0	0	0	0	0	0	0	0	0	0	0	0	0	0	0	0	0	0	1	0	0	0	0	0	0	0	0	1	1	0	0	0	0	1	0	0	0	0	0	0	0	0	0	0	1	0	0	0
	0	0	0	0	0	0	0	0	0	0	1	0	0	0	0	0	0	0	0	0	0	0	0	0	0	0	0	0	0	2	0	0	0	0	0	0	0	0	0	0	0	0	0	0	0	0	0	0	0
	0	0	0	0	0	0	0	0	0	0	0	0	0	0	0	0	0	0	0	0	0	0	0	0	0	1	0	0	0	0	0	0	0	0	0	0	0	0	0	0	0	0	0	0	1	0	0	1	0
	0	0	0	0	0	0	0	0	0	0	0	0	0	0	0	0	0	0	0	0	0	1	0	0	0	0	0	0	0	0	0	0	0	0	0	0	0	0	0	0	0	0	0	0	0	0	0	0	0
	0	0	0	0	0	0	0	0	0	0	0	0	0	0	0	0	0	0	0	0	0	0	0	0	0	0	0	0	0	0	0	0	0	0	0	0	0	0	0	0	0	0	0	0	0	0	0	0	1
	0	0	0	0	0	0	0	0	0	0	0	0	0	0	0	0	0	0	0	0	0	0	0	0	0	0	0	0	0	0	0	0	0	0	0	0	0	0	0	0	0	0	0	0	0	0	0	0	0
	0	1	0	0	0	0	0	0	0	0	0	0	0	0	0	0	0	0	0	0	0	1	0	0	0	0	0	0	0	0	0	1	0	0	0	0	0	0	1	0	0	0	0	0	0	0	1	2	0
	0	0	0	0	0	0	0	0	0	0	0	0	0	0	0	0	0	0	0	0	0	0	0	0	0	0	0	0	0	0	0	0	0	0	0	0	0	0	0	0	0	0	0	0	0	0	0	0	0
	0	0	0	0	0	0	0	0	0	0	0	0	0	0	0	0	0	0	0	0	0	0	0	0	0	0	0	0	0	0	0	0	0	0	0	0	0	0	0	0	0	0	0	0	0	0	0	0	0
	0	0	0	0	0	0	1	0	0	0	0	0	0	0	0	0	1	0	0	0	0	1	0	1	0	0	0	0	0	1	0	0	0	0	0	0	0	0	0	1	0	0	0	0	0	0	0	0	0
	0	0	0	0	0	0	0	0	0	0	0	0	0	0	0	0	0	0	0	0	0	0	0	0	1	0	0	0	0	1	0	0	0	0	0	0	0	0	0	0	0	0	1	0	0	0	0	0	0
	0	0	0	0	0	0	0	0	0	0	0	0	0	0	0	0	0	0	0	0	0	0	0	0	0	0	0	0	0	0	0	0	0	0	0	0	0	0	0	0	0	0	0	1	0	0	0	0	0
	0	0	0	0	0	0	0	0	0	0	0	0	0	0	0	0	0	0	0	0	0	0	0	0	0	0	0	0	0	0	0	0	0	0	0	0	1	0	0	0	0	0	0	0	0	0	0	0	0
	0	0	1	0	0	0	0	0	1	0	0	0	0	0	0	0	0	0	0	1	0	0	0	0	0	0	0	2	0	0	0	0	0	0	0	0	0	0	0	0	0	0	0	1	0	0	0	0	0
	0	0	0	0	0	0	0	0	0	0	0	0	0	0	0	0	0	0	0	0	0	0	0	0	0	0	0	0	1	0	0	0	0	1	0	0	0	0	0	0	0	0	0	0	0	0	0	0	0
	0	0	0	0	0	0	0	0	0	0	1	0	0	0	0	0	0	0	0	0	0	0	0	0	0	0	0	0	0	1	0	0	0	0	0	0	0	0	0	0	0	0	0	0	0	0	0	0	0
	0	0	0	0	0	0	0	0	0	0	0	0	0	0	0	0	0	0	0	0	0	0	0	0	0	0	0	0	2	0	2	0	0	0	0	0	0	0	0	0	0	0	2	0	0	0	0	0	0
	0	0	0	0	0	0	0	0	0	0	1	0	0	0	0	0	0	0	0	0	0	0	0	0	0	0	0	0	0	0	0	0	0	1	0	0	0	0	0	1	0	0	0	0	0	0	0	0	0
	0	0	0	0	0	0	0	0	0	0	0	0	0	0	0	0	0	0	0	0	0	0	0	0	0	0	0	0	0	0	0	1	0	0	0	0	0	0	0	0	0	0	0	0	0	0	0	0	0
	0	0	0	0	0	0	0	0	0	0	0	0	0	0	0	0	0	0	0	0	0	0	0	0	0	0	0	0	0	0	0	0	0	0	0	0	0	0	0	0	0	0	0	0	0	0	0	0	0
	0	0	0	0	0	0	0	0	0	0	0	0	0	0	0	0	0	0	0	0	0	0	0	0	0	0	0	0	0	0	0	0	0	0	0	0	0	0	0	1	0	0	1	0	0	0	0	0	0
	0	0	0	0	0	0	0	0	0	0	0	0	0	0	0	0	0	0	1	0	0	0	0	0	0	0	0	0	0	0	0	0	0	0	0	0	0	0	0	0	0	0	1	0	0	0	0	0	0
	0	0	0	2	0	0	0	0	0	0	0	0	0	0	0	0	2	0	0	0	0	0	0	0	0	4	0	1	1	1	2	0	0	0	2	0	0	0	0	0	0	0	3	2	0	0	1	1	0
	0	0	0	0	0	0	0	0	0	0	0	0	0	0	0	0	0	0	0	0	0	0	0	0	0	0	0	0	0	0	0	0	0	0	0	0	0	0	0	0	0	0	0	0	0	0	0	0	0
	0	0	0	0	0	0	0	0	0	0	0	0	0	0	0	0	0	0	0	0	0	0	0	0	0	0	0	0	0	0	0	0	0	0	0	0	1	0	0	0	0	0	1	0	0	0	0	0	0
	0	0	0	0	0	0	0	0	0	0	0	0	0	0	0	0	0	0	0	0	0	0	0	0	0	0	0	0	0	0	0	0	0	0	0	0	0	0	0	0	0	0	0	0	0	0	0	0	0
	0	0	0	0	0	0	0	0	0	0	0	0	0	0	0	0	0	0	0	0	0	0	0	0	0	0	0	0	0	0	0	0	0	0	0	0	0	0	0	0	0	0	0	0	0	1	0	0	0
	0	0	0	0	0	0	0	0	0	0	0	0	0	0	0	0	0	0	0	2	0	0	0	0	0	0	0	0	0	0	0	0	0	0	0	0	0	0	0	0	0	0	0	0	0	0	0	1	0
	0	0	0	0	0	0	0	0	0	0	0	0	0	0	0	0	0	0	0	0	0	0	0	0	0	0	0	0	0	0	0	0	0	0	0	0	0	0	0	0	0	0	0	0	0	0	0	0	0
	0	0	0	0	0	0	0	0	0	0	0	0	0	0	0	0	0	0	0	0	0	0	0	0	0	0	0	0	0	0	0	0	0	0	0	0	0	0	0	0	0	0	0	0	0	0	0	0	0
	0	0	0	0	0	0	0	0	0	0	0	0	0	0	0	0	0	0	0	0	1	0	0	0	0	0	0	0	0	0	0	0	0	0	0	0	0	0	0	0	0	0	0	0	0	0	0	0	1
	0	1	0	0	0	0	0	0	0	0	0	0	0	0	0	0	0	0	0	0	0	0	0	0	0	0	0	0	0	1	0	0	0	0	0	0	0	0	0	0	0	0	1	0	0	0	0	0	0
	0	0	0	0	0	0	0	0	0	0	0	0	0	0	0	0	0	0	0	0	0	0	0	0	0	0	0	0	0	0	0	0	0	0	1	0	0	0	0	0	0	0	0	0	0	0	0	0	0
	0	0	0	0	0	0	0	2	0	0	0	0	0	0	0	0	0	0	0	0	0	0	0	0	0	0	0	0	0	0	0	0	0	0	0	0	0	0	0	0	0	0	0	0	0	0	0	0	0
	0	0	0	0	0	0	0	0	0	0	0	0	0	1	0	0	0	0	0	0	0	0	1	0	0	0	0	0	0	0	0	0	0	0	0	0	0	0	0	0	0	0	0	0	0	0	0	1	0
	0	0	0	0	0	0	0	0	0	0	0	1	0	0	0	0	0	0	0	0	0	0	0	1	0	0	0	0	0	0	0	0	0	0	0	0	0	0	0	0	0	0	0	0	0	0	0	0	2
	0	0	0	0	0	0	0	0	0	1	0	0	0	0	0	0	0	0	0	0	0	0	0	0	0	0	0	0	0	0	0	0	0	0	0	0	0	0	0	0	0	0	0	0	0	0	0	0	0
	0	0	0	0	1	0	0	0	0	0	0	0	0	0	0	0	0	0	0	0	0	0	0	0	0	0	0	0	0	0	0	0	0	0	0	0	0	0	0	2	0	0	0	0	0	0	0	0	0
	0	0	0	0	0	0	0	0	0	0	0	0	0	0	0	0	0	0	0	0	0	0	0	0	0	0	0	0	0	0	0	0	0	0	0	0	0	0	0	0	0	0	0	0	0	0	0	0	0
	0	0	0	0	0	0	0	0	0	0	0	0	0	0	0	0	0	0	0	0	0	0	0	0	0	0	0	0	0	0	0	0	0	0	0	0	0	0	0	0	0	0	0	0	0	0	0	0	0
	0	0	0	0	0	0	0	0	0	0	0	0	0	0	0	0	0	0	0	0	0	0	0	0	0	0	0	0	0	0	0	0	0	0	0	0	0	0	1	0	0	0	0	0	0	0	0	0	0
	0	0	0	0	0	0	0	0	0	0	1	0	0	0	0	0	0	0	0	0	0	0	0	0	2	0	0	0	0	0	0	0	0	1	0	0	1	1	0	0	0	0	0	1	0	0	0	1	0
	0	1	0	0	0	0	1	0	1	0	0	0	0	0	0	1	1	0	0	0	0	0	0	0	0	1	0	0	0	0	0	0	0	0	0	0	0	0	1	0	0	0	0	0	0	0	0	0	0
	0	0	0	0	0	0	1	0	0	0	0	0	0	0	0	0	0	0	0	0	0	0	0	0	0	0	0	0	1	0	0	0	0	0	0	0	0	0	1	1	0	0	1	0	0	0	0	0	0
	0	0	1	0	0	0	0	0	1	1	0	0	0	0	0	2	0	0	0	0	0	0	0	0	3	0	0	0	1	0	0	0	0	0	0	0	0	0	1	0	0	0	0	2	0	0	1	0	0
	1	0	0	0	0	0	0	0	0	0	1	0	0	0	0	0	1	1	0	0	0	0	0	0	0	0	0	0	0	0	0	0	0	0	0	0	0	1	0	0	0	0	0	1	0	0	0	0	0
	0	0	0	0	0	0	0	0	0	1	0	0	0	0	0	0	0	0	0	0	0	0	0	0	2	0	0	0	0	0	0	0	0	0	0	0	0	0	0	0	0	0	1	1	0	0	0	0	0
	0	0	0	0	0	0	0	0	0	1	0	0	0	0	0	0	0	0	0	2	0	0	0	0	2	3	0	0	0	0	0	0	0	0	0	0	1	0	2	1	0	0	0	1	0	0	0	0	1
	0	0	0	0	0	0	0	0	0	0	0	0	0	0	0	0	0	0	0	0	1	0	0	0	2	0	0	0	1	0	0	1	0	0	0	0	0	1	1	0	0	0	0	1	0	0	0	0	2
	0	0	0	0	0	0	0	0	0	0	0	0	0	1	2	0	0	0	1	0	0	0	0	0	0	0	0	0	0	0	0	0	0	0	1	0	0	0	1	0	0	0	0	0	0	0	0	0	0
	0	1	0	0	0	0	0	0	0	1	0	0	1	0	0	0	0	1	0	1	0	0	0	0	1	0	0	0	0	0	0	0	0	0	0	0	0	1	0	0	0	0	0	2	1	0	0	1	2
	0	0	1	0	0	1	0	0	0	0	1	3	1	0	0	2	0	0	3	2	1	1	0	2	0	2	0	2	1	0	0	1	3	0	0	0	2	1	2	0	0	1	0	2	1	1	3	1	5
	0	4	0	0	1	1	0	1	0	0	0	0	1	0	0	0	1	0	0	1	0	0	0	2	4	5	2	2	0	1	1	1	0	0	1	0	0	2	0	0	0	0	2	1	1	0	0	0	3
	0	0	0	1	0	0	1	0	0	0	1	0	0	1	0	0	0	0	0	0	0	2	1	0	0	2	0	0	0	1	0	3	0	5	0	1	1	2	1	3	1	0	1	0	3	0	0	0	0
	0	0	0	0	0	0	0	0	0	0	0	0	1	0	0	0	0	2	1	0	0	0	0	2	4	5	0	0	3	0	2	0	0	1	0	0	0	1	0	0	0	0	1	0	0	0	0	1	2
	0	1	1	0	1	0	0	0	0	0	0	1	3	1	0	0	2	0	0	1	0	0	1	1	3	1	0	1	2	2	2	0	1	2	3	1	0	4	0	0	1	0	2	3	1	0	7	2	1
	0	1	1	1	0	0	0	1	0	0	1	0	0	3	0	0	2	0	1	0	0	0	1	0	1	1	0	3	2	1	1	1	0	1	0	0	0	1	1	0	0	0	0	0	2	0	0	2	0
	0	0	0	0	0	0	0	0	0	0	0	0	0	0	0	0	0	1	0	0	0	1	0	1	1	3	0	0	0	0	0	1	1	2	0	0	1	0	1	0	0	0	0	0	1	0	0	2	0
	0	1	0	0	1	0	0	0	0	0	3	1	1	0	0	1	1	0	0	0	2	0	0	0	0	1	0	0	1	1	2	4	3	1	1	1	2	0	0	0	1	0	0	0	4	0	1	3	3
	0	1	0	0	1	0	0	0	1	0	0	0	2	0	1	0	1	0	0	0	0	1	1	2	2	3	0	2	0	0	2	0	3	1	0	1	1	1	1	0	0	0	0	0	0	0	0	1	0
Fig. 6d	Neuron-to-neuron connection
	Postsynaptic
Presynaptic	0	0	0	0	0	0	0	0	0	0	0	0	0	0	0	0	0	0	0	0	0	0	0	0	0	0	0	0	0	0	0	0	0	0	0	0	0	0	0	0	0	0	0	0	0	0	0	0	0
	0	0	0	0	0	0	0	0	0	0	0	0	0	0	0	0	0	0	0	0	0	0	0	0	0	0	0	0	0	0	0	0	0	0	0	0	0	0	0	0	0	0	0	0	0	0	0	0	0
	0	0	0	0	0	0	0	0	0	0	0	0	0	1	0	0	0	0	0	0	0	0	0	0	0	0	1	0	0	0	0	0	0	0	0	0	0	0	0	0	0	0	1	0	0	0	0	0	0
	0	0	0	0	0	0	1	0	0	0	0	0	0	0	0	0	0	0	1	0	0	0	0	0	0	0	0	1	0	0	0	0	0	0	0	0	0	0	1	0	0	0	0	0	0	0	0	0	1
	0	0	0	0	0	0	0	0	0	0	0	0	0	0	0	0	0	0	1	0	0	0	0	0	0	0	0	0	0	0	0	0	0	0	0	1	0	0	0	0	0	0	0	0	0	0	0	0	0
	0	0	0	1	0	0	0	0	0	0	0	0	0	0	0	0	0	0	0	0	0	0	0	0	0	0	0	0	0	0	0	0	0	0	0	0	0	0	0	0	0	0	0	0	0	0	0	0	0
	0	0	0	0	0	0	0	0	0	0	0	0	0	0	0	0	0	0	0	0	0	0	0	0	0	0	0	0	0	0	0	0	0	0	0	0	0	0	0	0	0	0	0	0	0	0	0	0	0
	0	0	0	0	0	0	0	0	0	0	0	0	0	0	0	0	1	0	0	0	0	0	0	0	0	0	0	0	0	0	0	0	0	0	0	0	0	0	0	1	0	0	0	0	0	0	0	0	0
	0	1	0	0	0	0	0	0	0	0	0	0	0	0	0	0	0	0	0	0	0	0	0	0	0	1	0	0	0	0	0	0	0	0	0	0	0	0	0	0	0	0	0	1	0	0	0	1	0
	0	0	0	0	0	0	0	0	1	0	0	0	0	0	0	0	1	0	0	0	0	0	0	0	0	0	0	0	0	0	0	0	0	0	0	0	0	0	0	0	0	0	0	0	0	0	0	0	1
	0	1	0	0	0	0	0	0	0	0	0	0	0	0	0	0	0	0	0	0	0	0	0	0	0	0	0	0	0	0	0	0	0	0	0	0	0	0	0	0	0	0	0	0	0	0	0	0	0
	0	0	0	0	0	0	0	0	0	0	0	0	0	0	0	0	0	0	0	0	0	0	0	0	0	0	0	0	0	0	1	0	0	0	0	0	0	0	0	1	0	0	0	0	0	0	0	0	0
	0	0	0	1	0	1	0	0	0	0	0	0	0	0	0	0	0	0	1	0	0	0	0	0	0	0	0	0	0	0	0	1	0	0	0	0	0	0	0	0	0	0	0	0	0	0	0	0	0
	0	0	0	0	0	1	0	0	0	0	1	0	0	0	0	0	0	0	0	0	0	0	0	0	0	0	0	0	0	0	0	0	0	0	0	0	0	0	0	0	0	0	0	0	0	0	0	0	0
	0	0	0	0	0	0	0	0	0	0	0	0	0	0	0	0	0	0	0	0	0	0	0	0	0	0	0	0	0	0	0	0	0	0	0	0	0	0	0	0	0	0	1	0	0	0	0	0	0
	0	0	0	0	0	0	0	0	0	0	0	0	0	0	0	0	0	0	0	0	0	0	0	0	0	0	0	0	0	0	0	0	0	0	0	0	0	0	0	0	0	0	0	0	0	0	1	0	0
	0	0	0	0	0	0	0	0	0	0	0	0	0	0	0	0	0	0	0	0	0	0	0	0	0	0	0	0	0	0	0	0	0	0	0	0	0	1	0	1	0	0	0	0	0	0	0	0	1
	0	0	0	0	0	0	0	0	0	0	0	0	0	0	0	0	0	0	0	0	0	0	0	0	0	0	0	0	0	0	0	0	0	0	0	0	0	0	0	0	0	0	0	0	0	0	0	0	0
	0	0	0	0	0	0	0	0	0	0	0	0	0	0	0	0	0	0	0	0	0	0	0	0	0	0	0	0	0	0	0	0	0	0	0	0	0	0	0	0	0	0	0	1	0	0	0	0	0
	0	1	0	0	0	0	1	0	0	0	0	0	0	0	0	0	0	0	0	0	0	0	0	0	1	0	0	0	0	0	0	0	1	0	1	0	0	1	0	0	0	0	0	1	1	0	0	0	1
	0	0	0	0	0	0	0	0	0	0	0	0	0	0	0	0	0	0	1	0	0	0	0	0	0	0	0	0	0	0	0	0	0	0	1	0	0	0	0	0	0	0	1	0	0	0	0	0	0
	0	0	0	0	0	0	0	0	0	0	0	0	1	0	0	0	0	0	0	0	1	0	0	0	0	0	0	0	0	1	0	0	0	0	0	0	0	0	0	0	0	0	0	0	0	0	0	0	0
	0	0	1	0	0	0	0	0	0	0	0	1	0	0	0	0	0	0	0	0	0	0	0	0	1	1	0	0	0	0	0	0	0	0	0	0	0	0	0	0	0	0	0	0	0	0	0	0	0
	0	0	0	0	0	0	0	0	0	1	0	0	0	0	0	0	0	0	1	1	0	0	0	0	0	0	0	0	0	0	0	0	0	0	0	0	0	0	0	0	0	0	0	1	0	0	0	0	0
	0	0	0	0	0	0	0	0	0	0	0	0	0	1	0	0	0	0	1	0	0	1	0	0	0	0	0	0	0	0	0	0	0	0	0	0	1	0	0	0	0	0	0	1	0	0	0	0	0
	0	0	0	0	0	0	0	0	0	0	0	0	0	0	0	0	0	0	0	0	0	0	0	0	0	1	0	0	0	1	0	0	0	0	0	0	0	0	0	0	0	0	0	0	0	0	0	0	0
	0	0	0	0	0	0	0	0	0	0	0	0	0	0	0	0	0	0	0	0	0	0	0	0	1	0	0	0	0	0	0	0	0	0	0	0	0	0	0	0	0	0	0	0	0	0	0	0	0
	0	0	1	0	0	0	0	0	0	0	0	0	0	0	0	0	0	0	0	0	0	0	0	0	0	0	0	0	0	1	0	0	0	0	0	0	0	0	0	0	0	0	0	0	0	0	0	0	0
	0	0	0	0	0	0	0	0	0	0	0	0	0	0	0	0	0	0	0	0	0	0	0	0	0	0	0	0	0	0	0	0	0	0	0	0	0	0	0	0	0	0	0	0	0	0	0	0	0
	0	0	0	0	0	0	0	0	0	0	0	0	0	0	0	0	0	0	0	0	0	0	0	0	0	0	0	0	0	1	0	0	0	0	0	0	0	0	0	0	0	0	0	1	0	0	0	0	0
	0	0	0	0	0	0	0	0	0	0	0	0	0	0	0	0	0	0	0	0	0	0	0	0	0	0	0	0	0	0	0	0	0	0	0	0	0	0	0	0	0	0	0	0	0	0	0	0	0
	0	1	0	0	0	0	0	0	0	0	0	0	0	0	0	0	0	0	0	0	0	0	0	0	0	0	0	0	0	0	0	0	0	0	1	0	0	0	0	0	0	0	0	0	0	0	0	0	0
	0	0	0	0	0	0	0	0	0	0	0	0	0	0	0	0	0	0	0	0	0	0	0	0	0	0	0	0	0	0	0	0	0	0	0	0	0	0	0	0	0	0	0	0	0	0	0	0	0
	0	0	0	0	0	0	0	0	0	0	0	0	0	0	0	0	0	0	0	0	0	0	0	0	0	0	0	0	0	0	0	0	0	0	0	0	0	0	0	0	0	0	0	0	0	0	0	0	0
	0	0	0	0	0	0	0	0	0	0	0	0	0	0	0	0	0	0	0	1	0	0	0	1	0	0	0	0	0	0	0	0	0	0	0	0	0	0	0	0	0	0	0	0	0	0	0	0	0
	0	0	0	0	0	0	0	0	0	0	0	0	0	0	0	0	0	0	0	0	0	0	0	0	0	0	0	0	0	0	0	0	0	0	0	0	0	0	0	0	0	0	0	0	0	0	0	0	0
	0	0	0	0	0	0	0	0	0	1	0	0	0	0	0	0	0	0	0	0	0	0	0	0	0	0	0	0	0	0	0	0	0	0	0	0	0	0	0	0	0	0	0	1	0	0	1	0	0
	0	0	0	0	0	0	0	0	0	0	0	0	0	0	0	0	0	0	0	0	0	0	0	0	0	0	0	0	0	0	0	0	0	0	0	0	0	0	0	0	0	0	0	0	0	0	0	0	0
	1	0	0	0	1	0	0	0	0	0	0	0	0	0	1	0	1	0	0	0	0	0	0	0	0	0	0	1	0	0	0	0	0	0	0	0	0	0	0	0	0	0	1	0	0	0	1	0	0
	0	0	0	0	0	0	0	0	0	0	0	0	0	0	0	0	0	0	1	0	0	0	0	0	0	0	0	0	0	0	0	0	0	0	0	0	0	0	0	1	0	0	0	0	0	0	0	0	0
	0	0	0	0	0	0	0	0	0	0	0	0	0	0	0	0	0	0	0	0	0	0	0	0	0	0	0	0	0	0	0	1	0	0	0	0	0	0	0	0	0	0	0	0	0	0	0	0	0
	0	0	0	0	0	0	0	0	0	0	0	0	0	0	0	0	0	0	0	0	0	0	0	0	0	1	0	0	0	0	0	0	0	0	0	0	0	0	0	0	0	0	0	0	0	0	0	0	0
	0	0	0	0	0	0	0	0	0	0	0	0	0	0	0	0	0	0	0	0	0	0	0	0	0	0	0	0	0	0	0	0	0	0	0	0	0	0	0	0	0	0	0	0	0	0	0	0	0
	0	1	0	0	0	0	0	0	0	0	0	0	0	0	0	0	0	0	0	0	0	0	0	0	0	0	0	0	0	0	0	0	0	0	0	0	0	0	0	0	0	0	0	0	0	0	0	0	0
	0	0	0	0	0	0	0	0	0	0	0	0	0	0	0	0	0	0	0	1	0	0	0	0	0	0	0	0	1	1	0	0	0	0	1	0	0	0	0	0	0	0	0	0	0	1	0	0	0
	0	0	0	0	0	0	0	0	0	0	1	0	0	0	0	0	0	0	0	0	0	0	0	0	0	0	0	0	0	1	0	0	0	0	0	0	0	0	0	0	0	0	0	0	0	0	0	0	0
	0	0	0	0	0	0	0	0	0	0	0	0	0	0	0	0	0	0	0	0	0	0	0	0	0	1	0	0	0	0	0	0	0	0	0	0	0	0	0	0	0	0	0	0	1	0	0	1	0
	0	0	0	0	0	0	0	0	0	0	0	0	0	0	0	0	0	0	0	0	0	1	0	0	0	0	0	0	0	0	0	0	0	0	0	0	0	0	0	0	0	0	0	0	0	0	0	0	0
	0	0	0	0	0	0	0	0	0	0	0	0	0	0	0	0	0	0	0	0	0	0	0	0	0	0	0	0	0	0	0	0	0	0	0	0	0	0	0	0	0	0	0	0	0	0	0	0	1
	0	0	0	0	0	0	0	0	0	0	0	0	0	0	0	0	0	0	0	0	0	0	0	0	0	0	0	0	0	0	0	0	0	0	0	0	0	0	0	0	0	0	0	0	0	0	0	0	0
	0	1	0	0	0	0	0	0	0	0	0	0	0	0	0	0	0	0	0	0	0	1	0	0	0	0	0	0	0	0	0	1	0	0	0	0	0	0	1	0	0	0	0	0	0	0	1	1	0
	0	0	0	0	0	0	0	0	0	0	0	0	0	0	0	0	0	0	0	0	0	0	0	0	0	0	0	0	0	0	0	0	0	0	0	0	0	0	0	0	0	0	0	0	0	0	0	0	0
	0	0	0	0	0	0	0	0	0	0	0	0	0	0	0	0	0	0	0	0	0	0	0	0	0	0	0	0	0	0	0	0	0	0	0	0	0	0	0	0	0	0	0	0	0	0	0	0	0
	0	0	0	0	0	0	1	0	0	0	0	0	0	0	0	0	1	0	0	0	0	1	0	1	0	0	0	0	0	1	0	0	0	0	0	0	0	0	0	1	0	0	0	0	0	0	0	0	0
	0	0	0	0	0	0	0	0	0	0	0	0	0	0	0	0	0	0	0	0	0	0	0	0	1	0	0	0	0	1	0	0	0	0	0	0	0	0	0	0	0	0	1	0	0	0	0	0	0
	0	0	0	0	0	0	0	0	0	0	0	0	0	0	0	0	0	0	0	0	0	0	0	0	0	0	0	0	0	0	0	0	0	0	0	0	0	0	0	0	0	0	0	1	0	0	0	0	0
	0	0	0	0	0	0	0	0	0	0	0	0	0	0	0	0	0	0	0	0	0	0	0	0	0	0	0	0	0	0	0	0	0	0	0	0	1	0	0	0	0	0	0	0	0	0	0	0	0
	0	0	1	0	0	0	0	0	1	0	0	0	0	0	0	0	0	0	0	1	0	0	0	0	0	0	0	1	0	0	0	0	0	0	0	0	0	0	0	0	0	0	0	1	0	0	0	0	0
	0	0	0	0	0	0	0	0	0	0	0	0	0	0	0	0	0	0	0	0	0	0	0	0	0	0	0	0	1	0	0	0	0	1	0	0	0	0	0	0	0	0	0	0	0	0	0	0	0
	0	0	0	0	0	0	0	0	0	0	1	0	0	0	0	0	0	0	0	0	0	0	0	0	0	0	0	0	0	1	0	0	0	0	0	0	0	0	0	0	0	0	0	0	0	0	0	0	0
	0	0	0	0	0	0	0	0	0	0	0	0	0	0	0	0	0	0	0	0	0	0	0	0	0	0	0	0	1	0	1	0	0	0	0	0	0	0	0	0	0	0	1	0	0	0	0	0	0
	0	0	0	0	0	0	0	0	0	0	1	0	0	0	0	0	0	0	0	0	0	0	0	0	0	0	0	0	0	0	0	0	0	1	0	0	0	0	0	1	0	0	0	0	0	0	0	0	0
	0	0	0	0	0	0	0	0	0	0	0	0	0	0	0	0	0	0	0	0	0	0	0	0	0	0	0	0	0	0	0	1	0	0	0	0	0	0	0	0	0	0	0	0	0	0	0	0	0
	0	0	0	0	0	0	0	0	0	0	0	0	0	0	0	0	0	0	0	0	0	0	0	0	0	0	0	0	0	0	0	0	0	0	0	0	0	0	0	0	0	0	0	0	0	0	0	0	0
	0	0	0	0	0	0	0	0	0	0	0	0	0	0	0	0	0	0	0	0	0	0	0	0	0	0	0	0	0	0	0	0	0	0	0	0	0	0	0	1	0	0	1	0	0	0	0	0	0
	0	0	0	0	0	0	0	0	0	0	0	0	0	0	0	0	0	0	1	0	0	0	0	0	0	0	0	0	0	0	0	0	0	0	0	0	0	0	0	0	0	0	1	0	0	0	0	0	0
	0	0	0	1	0	0	0	0	0	0	0	0	0	0	0	0	1	0	0	0	0	0	0	0	0	1	0	1	1	1	1	0	0	0	1	0	0	0	0	0	0	0	1	1	0	0	1	1	0
	0	0	0	0	0	0	0	0	0	0	0	0	0	0	0	0	0	0	0	0	0	0	0	0	0	0	0	0	0	0	0	0	0	0	0	0	0	0	0	0	0	0	0	0	0	0	0	0	0
	0	0	0	0	0	0	0	0	0	0	0	0	0	0	0	0	0	0	0	0	0	0	0	0	0	0	0	0	0	0	0	0	0	0	0	0	1	0	0	0	0	0	1	0	0	0	0	0	0
	0	0	0	0	0	0	0	0	0	0	0	0	0	0	0	0	0	0	0	0	0	0	0	0	0	0	0	0	0	0	0	0	0	0	0	0	0	0	0	0	0	0	0	0	0	0	0	0	0
	0	0	0	0	0	0	0	0	0	0	0	0	0	0	0	0	0	0	0	0	0	0	0	0	0	0	0	0	0	0	0	0	0	0	0	0	0	0	0	0	0	0	0	0	0	1	0	0	0
	0	0	0	0	0	0	0	0	0	0	0	0	0	0	0	0	0	0	0	1	0	0	0	0	0	0	0	0	0	0	0	0	0	0	0	0	0	0	0	0	0	0	0	0	0	0	0	1	0
	0	0	0	0	0	0	0	0	0	0	0	0	0	0	0	0	0	0	0	0	0	0	0	0	0	0	0	0	0	0	0	0	0	0	0	0	0	0	0	0	0	0	0	0	0	0	0	0	0
	0	0	0	0	0	0	0	0	0	0	0	0	0	0	0	0	0	0	0	0	0	0	0	0	0	0	0	0	0	0	0	0	0	0	0	0	0	0	0	0	0	0	0	0	0	0	0	0	0
	0	0	0	0	0	0	0	0	0	0	0	0	0	0	0	0	0	0	0	0	1	0	0	0	0	0	0	0	0	0	0	0	0	0	0	0	0	0	0	0	0	0	0	0	0	0	0	0	1
	0	1	0	0	0	0	0	0	0	0	0	0	0	0	0	0	0	0	0	0	0	0	0	0	0	0	0	0	0	1	0	0	0	0	0	0	0	0	0	0	0	0	1	0	0	0	0	0	0
	0	0	0	0	0	0	0	0	0	0	0	0	0	0	0	0	0	0	0	0	0	0	0	0	0	0	0	0	0	0	0	0	0	0	1	0	0	0	0	0	0	0	0	0	0	0	0	0	0
	0	0	0	0	0	0	0	1	0	0	0	0	0	0	0	0	0	0	0	0	0	0	0	0	0	0	0	0	0	0	0	0	0	0	0	0	0	0	0	0	0	0	0	0	0	0	0	0	0
	0	0	0	0	0	0	0	0	0	0	0	0	0	1	0	0	0	0	0	0	0	0	1	0	0	0	0	0	0	0	0	0	0	0	0	0	0	0	0	0	0	0	0	0	0	0	0	1	0
	0	0	0	0	0	0	0	0	0	0	0	1	0	0	0	0	0	0	0	0	0	0	0	1	0	0	0	0	0	0	0	0	0	0	0	0	0	0	0	0	0	0	0	0	0	0	0	0	1
	0	0	0	0	0	0	0	0	0	1	0	0	0	0	0	0	0	0	0	0	0	0	0	0	0	0	0	0	0	0	0	0	0	0	0	0	0	0	0	0	0	0	0	0	0	0	0	0	0
	0	0	0	0	1	0	0	0	0	0	0	0	0	0	0	0	0	0	0	0	0	0	0	0	0	0	0	0	0	0	0	0	0	0	0	0	0	0	0	1	0	0	0	0	0	0	0	0	0
	0	0	0	0	0	0	0	0	0	0	0	0	0	0	0	0	0	0	0	0	0	0	0	0	0	0	0	0	0	0	0	0	0	0	0	0	0	0	0	0	0	0	0	0	0	0	0	0	0
	0	0	0	0	0	0	0	0	0	0	0	0	0	0	0	0	0	0	0	0	0	0	0	0	0	0	0	0	0	0	0	0	0	0	0	0	0	0	0	0	0	0	0	0	0	0	0	0	0
	0	0	0	0	0	0	0	0	0	0	0	0	0	0	0	0	0	0	0	0	0	0	0	0	0	0	0	0	0	0	0	0	0	0	0	0	0	0	1	0	0	0	0	0	0	0	0	0	0
	0	0	0	0	0	0	0	0	0	0	1	0	0	0	0	0	0	0	0	0	0	0	0	0	1	0	0	0	0	0	0	0	0	1	0	0	1	1	0	0	0	0	0	1	0	0	0	1	0
	0	1	0	0	0	0	1	0	1	0	0	0	0	0	0	1	1	0	0	0	0	0	0	0	0	1	0	0	0	0	0	0	0	0	0	0	0	0	1	0	0	0	0	0	0	0	0	0	0
	0	0	0	0	0	0	1	0	0	0	0	0	0	0	0	0	0	0	0	0	0	0	0	0	0	0	0	0	1	0	0	0	0	0	0	0	0	0	1	1	0	0	1	0	0	0	0	0	0
	0	0	1	0	0	0	0	0	1	1	0	0	0	0	0	1	0	0	0	0	0	0	0	0	1	0	0	0	1	0	0	0	0	0	0	0	0	0	1	0	0	0	0	1	0	0	1	0	0
	1	0	0	0	0	0	0	0	0	0	1	0	0	0	0	0	1	1	0	0	0	0	0	0	0	0	0	0	0	0	0	0	0	0	0	0	0	1	0	0	0	0	0	1	0	0	0	0	0
	0	0	0	0	0	0	0	0	0	1	0	0	0	0	0	0	0	0	0	0	0	0	0	0	1	0	0	0	0	0	0	0	0	0	0	0	0	0	0	0	0	0	1	1	0	0	0	0	0
	0	0	0	0	0	0	0	0	0	1	0	0	0	0	0	0	0	0	0	1	0	0	0	0	1	1	0	0	0	0	0	0	0	0	0	0	1	0	1	1	0	0	0	1	0	0	0	0	1
	0	0	0	0	0	0	0	0	0	0	0	0	0	0	0	0	0	0	0	0	1	0	0	0	1	0	0	0	1	0	0	1	0	0	0	0	0	1	1	0	0	0	0	1	0	0	0	0	1
	0	0	0	0	0	0	0	0	0	0	0	0	0	1	1	0	0	0	1	0	0	0	0	0	0	0	0	0	0	0	0	0	0	0	1	0	0	0	1	0	0	0	0	0	0	0	0	0	0
	0	0	0	0	0	0	0	0	0	0	0	0	0	0	0	0	0	0	0	0	0	0	0	0	0	0	0	0	0	0	0	0	0	0	0	0	0	0	0	0	0	0	0	1	0	0	0	0	1
	0	0	0	0	0	0	0	0	0	0	0	1	0	0	0	1	0	0	1	1	0	0	0	1	0	1	0	1	0	0	0	0	1	0	0	0	1	0	1	0	0	0	0	1	0	0	1	0	1
	0	1	0	0	0	0	0	0	0	0	0	0	0	0	0	0	0	0	0	0	0	0	0	1	1	1	1	1	0	0	0	0	0	0	0	0	0	1	0	0	0	0	1	0	0	0	0	0	1
	0	0	0	0	0	0	0	0	0	0	0	0	0	0	0	0	0	0	0	0	0	1	0	0	0	1	0	0	0	0	0	1	0	1	0	0	0	1	0	1	0	0	0	0	1	0	0	0	0
	0	0	0	0	0	0	0	0	0	0	0	0	0	0	0	0	0	1	0	0	0	0	0	1	1	1	0	0	1	0	1	0	0	0	0	0	0	0	0	0	0	0	0	0	0	0	0	0	1
	0	0	0	0	0	0	0	0	0	0	0	0	1	0	0	0	1	0	0	0	0	0	0	0	1	0	0	0	1	1	1	0	0	1	1	0	0	1	0	0	0	0	1	1	0	0	1	1	0
	0	0	0	0	0	0	0	0	0	0	0	0	0	1	0	0	1	0	0	0	0	0	0	0	0	0	0	1	1	0	0	0	0	0	0	0	0	0	0	0	0	0	0	0	1	0	0	1	0
	0	0	0	0	0	0	0	0	0	0	0	0	0	0	0	0	0	0	0	0	0	0	0	0	0	1	0	0	0	0	0	0	0	1	0	0	0	0	0	0	0	0	0	0	0	0	0	1	0
	0	0	0	0	0	0	0	0	0	0	1	0	0	0	0	0	0	0	0	0	1	0	0	0	0	0	0	0	0	0	1	1	1	0	0	0	1	0	0	0	0	0	0	0	1	0	0	1	1
	0	0	0	0	0	0	0	0	0	0	0	0	1	0	0	0	0	0	0	0	0	0	0	1	1	1	0	1	0	0	1	0	1	0	0	0	0	0	0	0	0	0	0	0	0	0	0	0	0
Pre. partners (#)	2	9	4	3	2	2	5	1	4	6	7	3	3	5	2	3	9	2	10	7	4	5	1	7	13	14	2	8	10	12	7	7	4	6	8	1	7	8	10	11	0	0	15	19	5	2	8	11	14
Post. partners (#)	1	3	5	7	4	1	0	2	9	3	2	4	9	2	3	4	4	1	4	13	6	4	5	6	8	3	3	2	0	6	0	4	0	1	4	2	5	0	11	4	1	3	1	4	8	3	5	2	1
[truncated: 55 more columns]
