# Supplementary material for: SynEM, automated synapse detection for connectomics
Source: eLife. 2017 Jul 14;6:e26414. doi: 10.7554/eLife.26414 (PMC5658066; doi:10.7554/eLife.26414)
Supplement: Figure 7—source data 1. — DOI: http://dx.doi.org/10.7554/eLife.26414.030 [file elife-26414-fig7-data1.xlsx]

## Sheet: Sheet1
Fig. 7a
SynEM TP spine synapses ASI (μm3)	0.0625045	0.0694786	0.0327393	0.244377	0.0736671	0.358872	0.337809	0.328288	0.278796	0.154942	0.0490581	0.0866453	0.360586	0.149695	0.237303	0.157923	0.26705	0.0788828	0.0733394	0.238643	0.921358	0.107351	0.14561	0.262756	0.214419	0.567053	0.350129	0.381329	0.28046	0.263221	0.236823	0.0709698	0.472072	0.376476	0.273597	0.187673	0.202791	0.351816	0.136669	0.142241	1.13161	0.295793	0.764429	0.53295	0.441909	0.531561	0.205141	0.684699	0.326672
Bin edges	0.005	0.025	0.045	0.065	0.085	0.105	0.125	0.145	0.165	0.185	0.205	0.225	0.245	0.265	0.285	0.305	0.325	0.345	0.365	0.385	0.405	0.425	0.445	0.465	0.485	0.505	0.525	0.545	0.565	0.585	0.605	0.625	0.645	0.665	0.685	0.705	0.725	0.745	0.765	0.785	0.805	0.825	0.845	0.865	0.885	0.905	0.925	0.945	0.965
Bin counts	0	0.828729	1.9337	4.14365	3.31492	3.8674	3.8674	3.31492	1.65746	2.20994	1.9337	2.48619	1.65746	1.9337	1.38122	1.38122	1.10497	1.38122	1.9337	0.552486	0	0.552486	1.10497	1.9337	0	0.276243	1.10497	0.552486	0.552486	0	0	0	0.276243	0.276243	0	0.552486	0.276243	0.276243	0	0	0.276243	0	0	0	0	0.276243	0	0	0
Fig. 7b
Bin edges	-3.5	-3.316	-3.132	-2.948	-2.764	-2.58	-2.396	-2.212	-2.028	-1.844	-1.66	-1.476	-1.292	-1.108	-0.924	-0.74	-0.556	-0.372	-0.188	-0.004	0.18
Bin counts	0.0300264	0.0600528	0.0900793	0.0900793	0.270238	0.390344	0.270238	0.450396	0.570502	0.360317	0.42037	0.510449	0.480423	0.450396	0.270238	0.390344	0.0600528	0.150132	0.0600528	0.0600528
[truncated: 132 more columns]
