# Supplementary material for: SynEM, automated synapse detection for connectomics
Source: eLife journal article supplement (doi:10.7554/elife.26414), 2017-07-14
Supplement: supp [file elife_poa_e26414_Figure_3_figure_supplement_1.pdf › elife_poa_e26414_Figure_3_figure_supplement_1.pdf]

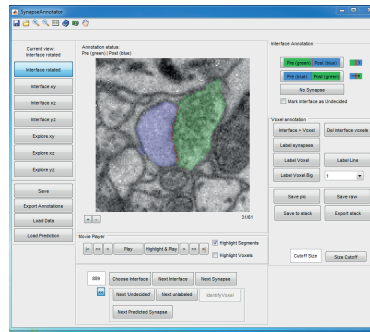

Figure 3 - figure supplement 1  
Staffler et al.

Graphical user interface (implemented in MATLAB) for efficient annotation of neurite interfaces as used for generating the training and validation labels. 3D image data is centered to the neurite interface and rotated such that the second and third principal components of the neurite interface span the displayed image plane. Segments are indicated by transparent overlay (interface, red; subsegment S1, blue and S2, green). Note that the test labels were independently annotated by volume search by multiple experts in webKnossos (Boergens et al., 2017), see Methods.
