# Supplementary material for: SynEM, automated synapse detection for connectomics
Source: eLife journal article supplement (doi:10.7554/elife.26414), 2017-07-14
Supplement: supp [file elife_poa_e26414_Figure_3_figure_supplement_2.pdf › elife_poa_e26414_Figure_3_figure_supplement_2.pdf]

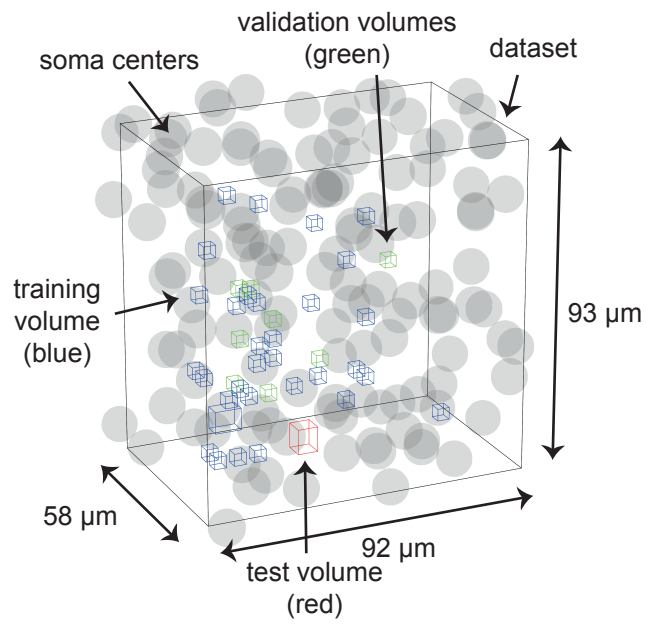

Figure 3 - figure supplement 2  
Staffler et al.

Distribution of training, validation and test data volumes within the dataset ex145\_07x2. Soma locations are indicated by spheres of radius 5  $\mu\text{m}$ .
