# Supplementary material for: SynEM, automated synapse detection for connectomics
Source: eLife journal article supplement (doi:10.7554/elife.26414), 2017-07-14
Supplement: supp [file elife_poa_e26414_Figure_3_figure_supplement_3.pdf › elife_poa_e26414_Figure_3_figure_supplement_3.pdf]

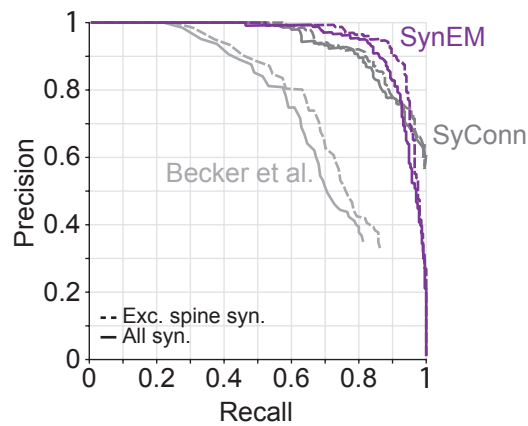

Figure 3 - figure supplement 3  
Staffler et al.

Synapse detection performance comparison of SynEM with SyConn (Dorkenwald et al., 2017) and (Becker et al., 2012) on the 3D SBEM SynEM test set (Figure 3e). Note that while SynEM performs synapse detection and partner detection in one step these are separate steps in SyConn with an overall performance that is potentially different from the synapse detection step (in Dorkenwald et al., 2017, a reduction in performance by 10% in recall and 3% in precision from synapse detection to partner detection is reported, yielding a drop in F1 score of 0.057). Becker et al., 2012, does not contain a dedicated partner detection step.
