# Supplementary material for: SynEM, automated synapse detection for connectomics
Source: eLife journal article supplement (doi:10.7554/elife.26414), 2017-07-14
Supplement: supp [file elife_poa_e26414_Figure_3_figure_supplement_4.pdf › elife_poa_e26414_Figure_3_figure_supplement_4.pdf]

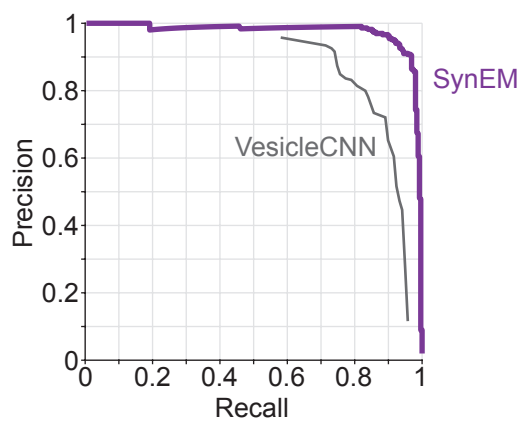

Figure 3 - figure supplement 4  
Staffler et al.

Synapse detection performance comparison of SynEM with VesicleCNN (Roncal et al., 2015) on a 3D EM dataset from mouse S1 cortex obtained using ATUM-SEM (Kasthuri et al., 2015). Note that VesicleCNN was developed on that ATUM-SEM dataset.
