# Supplementary material for: SynEM, automated synapse detection for connectomics
Source: eLife journal article supplement (doi:10.7554/elife.26414), 2017-07-14
Supplement: supp [file elife_poa_e26414_Figure_5_figure_supplement_1.pdf › elife_poa_e26414_Figure_5_figure_supplement_1.pdf]

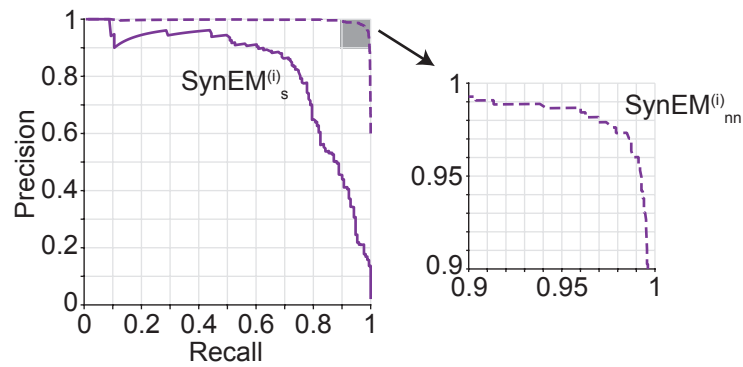

Figure 5 - figure supplement 1  
Staffler et al.

Performance of SynEM on a test set containing all interfaces between 3 inhibitory axons and all touching neurites (total of 9430 interfaces, 171 synapses). Single synapse detection precision and recall (solid line) and the ensuing predicted neuron-to-neuron precision and recall for inhibitory connections (dashed line) assuming on average 6 synapses for connections from interneurons (see Methods).
