# Supplementary material for: SynEM, automated synapse detection for connectomics
Source: eLife journal article supplement (doi:10.7554/elife.26414), 2017-07-14
Supplement: supp [file elife_poa_e26414_Figure_5_figure_supplement_2.pdf › elife_poa_e26414_Figure_5_figure_supplement_2.pdf]

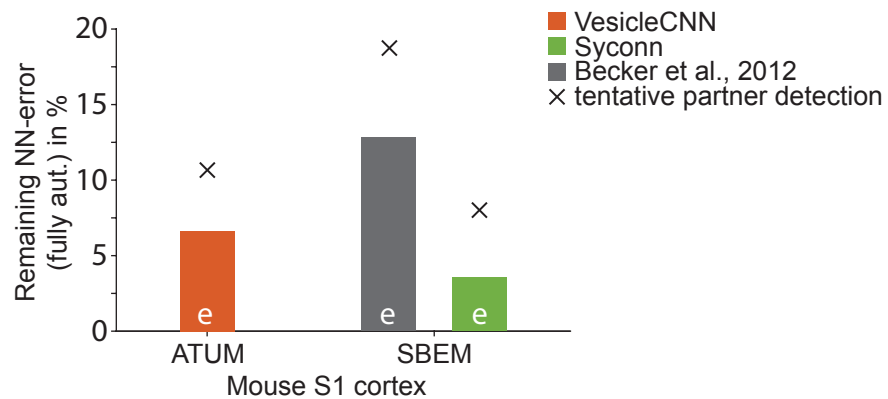

**Figure 5 - figure supplement 2**  
**Staffler et al.**

Effect of synapse detection errors on predicted connectome error rates for competing methods. Predicted neuron-to-neuron errors (reported as  $(1 - F1 \text{ score})$  in percent) for the ATUM-SEM dataset (Kasthuri et al., 2015) using VesicleCNN (Roncal et al., 2015, orange) and for our SBEM dataset using Becker et al., 2012 (gray) and Syconn (Dorkenwald et al., 2017, green). Note that these approaches provide synapse detection, only. When including the detection of the synaptic partners, Dorkenwald et al., 2017 reported a drop of detection performance by 3% precision and 10% recall (indicated by gray crosses, tentatively also for the other approaches). SynEM provides synapse detection and partner detection together (compare to Fig. 5e).
