# Supplementary material for: SynEM, automated synapse detection for connectomics
Source: eLife journal article supplement (doi:10.7554/elife.26414), 2017-07-14
Supplement: supp [file elife_poa_e26414_Figure_5_figure_supplement_2_source_data_1.xlsx]

## Sheet: Sheet1
Fig. 5 - figure supplement 2	Neuron-to-neuron (1 - F1)	Neuron-to-neuron (1 - F1) including estimated partner detection
Roncal et al., 2015 (VesicleCNN)	0.0662178	0.106153
Becker et al., 2012	0.128028	0.188048
Dorkenwald et al., 2017 (SyConn)	0.0354717	0.0798184
