# Supplementary material for: SynEM, automated synapse detection for connectomics
Source: eLife journal article supplement (doi:10.7554/elife.26414), 2017-07-14
Supplement: supp [file elife_poa_e26414_Figure_6_figure_supplement_1.pdf › elife_poa_e26414_Figure_6_figure_supplement_1.pdf]

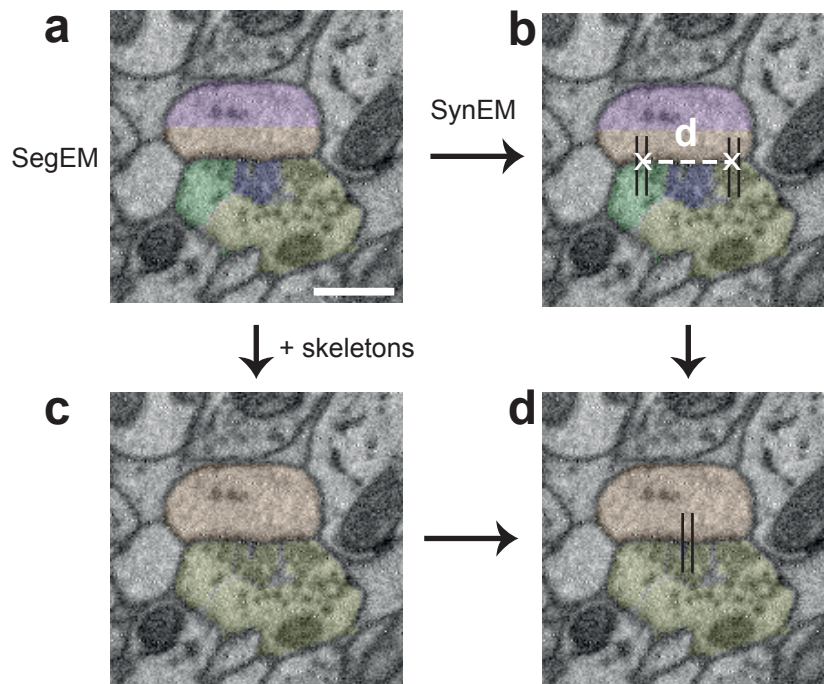

**Figure 6 - figure supplement 1**  
**Staffler et al.**

Procedure for obtaining synapse counts in the local connectome (Fig. 6). (a) Segmentation used for SynEM (note that a segmentation biased to neurite splits was used, see Berning et al., 2015) and (b) interfaces detected as synaptic (black lines). (c) combined skeleton-SegEM segmentation of neurites. (d) Synaptic neurite interfaces established between the same pre- and postsynaptic processes (as determined by the skeleton-SegEM segmentation, c) were clustered using hierarchical clustering with a distance cutoff of  $d = 1.5 \mu\text{m}$  (b) for obtaining the final synapse count. Scale bar, 500 nm.
